# Supplementary material for: Identification and Mechanistic Analysis of Toxic Degradation Products in the Advanced Oxidation Pathways of Fluoroquinolone Antibiotics
Source: MDPI journal article supplement (doi:10.3390/toxics12030203), 2024-03-06
Supplement: s1 [file s1]

# Identification and Mechanistic Analysis of Toxic Degradation Products in the Advanced Oxidation Pathways of Fluoroquinolone Antibiotics

Shuhai Sun <sup>1,†</sup>, Zhonghe Wang <sup>2,†</sup>, Qikun Pu <sup>2</sup>, Xinao Li <sup>2</sup>, Yuhan Cui <sup>2</sup>, Hao Yang <sup>2,\*</sup>  
and Yu Li <sup>2,\*</sup>

<sup>1</sup> School of Hydraulic and Environmental Engineering, Changchun Institute of Technology,  
Changchun 130012, China; sun18117471@163.com

<sup>2</sup> MOE Key Laboratory of Resources and Environmental System Optimization, North China Electric Power University, Beijing 102206, China;  
zhonghe\_wang1999@163.com (Z.W.); puqikun2000@163.com (Q.P.);  
lixinao921734261@163.com (X.L.); 120222232050@ncepu.edu.cn (Y.C.)

\* Correspondence: yh13601614368@163.com (H.Y.); liyuxx8@hotmail.com (Y.L.)

† These authors contributed equally to this work.

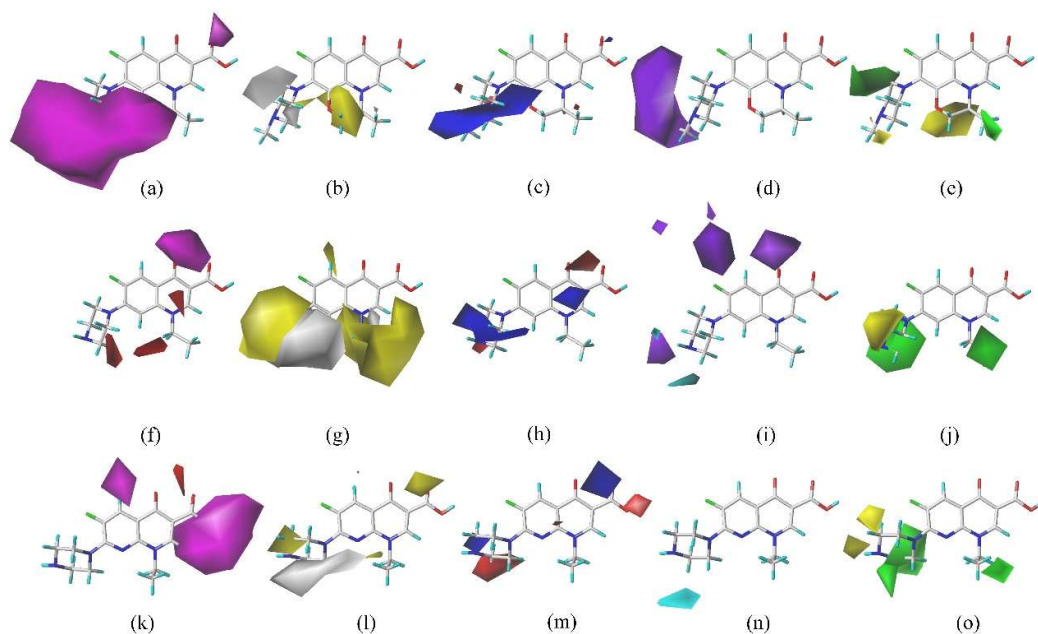

**Figure S1** Equipotential diagram of FQs molecule CoMSIA model ((a) hydrogen bond receptor field of defluorinated CoMSIA model; (b) Hydrophobic field of defluorinated CoMSIA model; (c) Defluorinated CoMSIA model electrostatic field; (d) Defluorinated CoMSIA model hydrogen bond donor field; (e) Defluorinated CoMSIA model three-dimensional field; (f) Hydroxylated CoMSIA model hydrogen bond receptor field; (g) Hydrophobic field of hydroxylated CoMSIA model; (h) Hydroxylated CoMSIA model electrostatic field; (i) Hydroxylated CoMSIA model

hydrogen bond donor field; (j) Hydroxylated CoMSIA model stereo field; (k) CoMSIA model hydrogen bond receptor field for hydroxylation of piperazine ring; (l) Hydrophobic field of CoMSIA model for hydroxylation of piperazine ring; (m) CoMSIA model electrostatic field for hydroxylation of piperazine ring; (n) CoMSIA model hydrogen bond donor field for hydroxylation of piperazine ring; (o) CoMSIA model for hydroxylation of piperazine ring in three-dimensional field.

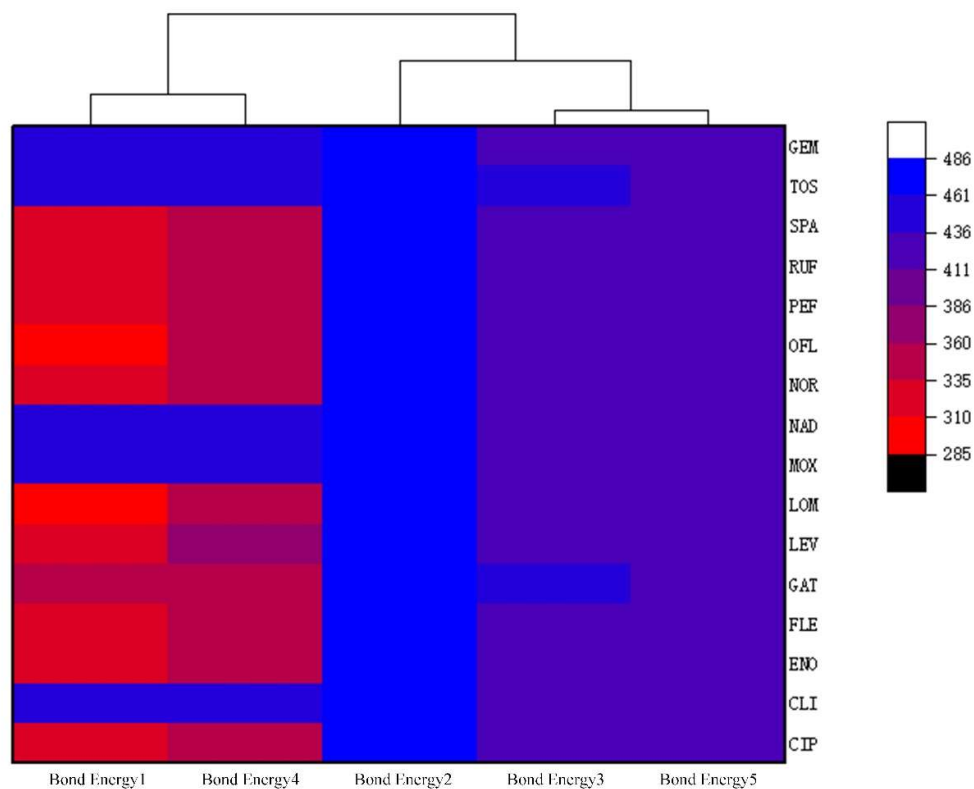

**Figure S2** FQs Molecular column clustering analysis chart.
