# Supplementary material for: Identification and Mechanistic Analysis of Toxic Degradation Products in the Advanced Oxidation Pathways of Fluoroquinolone Antibiotics
Source: Toxics. 2024 Mar 6;12(3):203. doi: 10.3390/toxics12030203 (PMC10976194; doi:10.3390/toxics12030203)
Supplement: Supplementary file 1 [file toxics-12-00203-s001.zip › Supplementary Material.xlsx]

## Sheet: S1
	Human Toxicity																				Eco Toxicity																		Human Toxicity		average value
	Androgen Receptor-mediated effect	Estrogen Receptor-mediated effect	Endocrine Disruptor activity screening	Carcinogenicity	Chromosomal aberration	Mutagenicity	The comprehensive indicator value of the "three risks"	Developmental Toxicity	Hepatotoxicity	Comprehensive indicators of developmental toxicity and hepatotoxicity risk	Acute Toxicity(LD50)		standardized value	Eye Irritation	Skin Sensitization	Skin Irritation	Comprehensive indicators of eye irritation, skin sensitization, and skin irritation risk		Overall indicators of human health risks		Algae Chronic Toxicity		standardized value	Fathead Minnow LC50 96h）		standardized value	Daphnia Magna LC50 48h		standardized value		BCF		standardized value	kM/Half-Life	standardized value		Overall indicators of ecological environment risk			P1-I1	5.03599		CIP-P1-I1	4.74118		FLE-P1-I1	5.71288		LOM-1-1
CIP	NON-active	NON-active	Inactive	NON-Carcinogen	Active	Mutagenic	2	Toxicant	Toxic	2	1957.89 mg/kg	1957.89	0.290986	Irritant	Sensitizer	NON-Sensitizer	2		6.29099		0.2082 mg/L	0.2082	0.84768	3.32 mg/L	3.32	0.985283	0.6171 mg/L	0.6171	0.999174	2.83214	0.32 log(L/kg)	0.32	0.5	-2.61	0.460201		3.79234			P1-I2	5.51356		CIP-P1-I2	5.82018		FLE-P1-I2	3.92239		LOM-1-2
CLI	NON-active	NON-active	Inactive	NON-Carcinogen	Inactive	Mutagenic	1	Toxicant	Toxic	2	2059.86 mg/kg	2059.86	0.310763	Irritant	Sensitizer	NON-Sensitizer	2		5.31076		0.2224 mg/L	0.2224	0.821838	1.25 mg/L	1.25	0.994727	0.386 mg/L	0.386	0.999651	2.81622	0.22 log(L/kg)	0.22	0.388889	-2.48	0.485878		3.69098			P1-I3	5.69446		CIP-P1-I3	5.82018		FLE-P1-I3	3.92761		LOM-1-3
ENO	NON-active	NON-active	Inactive	NON-Carcinogen	Active	Mutagenic	2	Toxicant	Toxic	2	5325.73 mg/kg	5325.73	0.0558155	Irritant	Sensitizer	NON-Sensitizer	2		6.05582		0.4954 mg/L	0.4954	0.325023	42.61 mg/L	42.61	0.80602	6.96 mg/L	6.96	0.986101	2.11714	0.14 log(L/kg)	0.14	0.3	-2.85	0.412799		2.82994			P2-I1	5.87647		CIP-P2-I1	7.71199		FLE-P2-I1	6.59847		LOM-2
FLE	NON-active	NON-active	Inactive	NON-Carcinogen	Active	Mutagenic	2	Toxicant	Toxic	2	2096.69 mg/kg	2096.69	0.682094	Irritant	Sensitizer	NON-Sensitizer	2		6.68209		0.3402 mg/L	0.3402	0.607461	15.1 mg/L	15.1	0.931536	2.43 mg/L	2.43	0.995438	2.53443	0.3 log(L/kg)	0.3	0.477778	-3.13	0.357496		3.36971			P3-I1	5.30405		CIP-P3-I1	6.69497		FLE-P3-I1	5.66538		LOM-3
GAT	NON-active	NON-active	Inactive	NON-Carcinogen	Active	NON-Mutagenic	1	Toxicant	Toxic	2	2627.57 mg/kg	2627.57	0.579128	Irritant	Sensitizer	NON-Sensitizer	2		5.57913		0.2348 mg/L	0.2348	0.799272	1.31 mg/L	1.31	0.994453	0.4579 mg/L	0.4579	0.999502	2.79323	0.32 log(L/kg)	0.32	0.5	-2.49	0.483903		3.77713			P4-I1	5.24124		CIP-P4-I1	6.69544		FLE-P4-I1	5.6654		LOM-4-1
LEV	NON-active	NON-active	Inactive	NON-Carcinogen	Inactive	Mutagenic	1	Toxicant	NON-Toxic	1	1472.44 mg/Kg	1472.44	0.803168	Irritant	Sensitizer	NON-Sensitizer	2		4.80317		0.2655 mg/L	0.2655	0.743403	29.85 mg/L	29.85	0.864238	2.83 mg/L	2.83	0.994613	2.60225	0.16 log(L/kg)	0.16	0.322222	-2.97	0.389097		3.31357			P4-I2	5.79126		CIP-P4-I2	6.69886		FLE-P4-I2	6.58077		LOM-4-2
LOM	NON-active	NON-active	Inactive	NON-Carcinogen	Inactive	NON-Mutagenic	0	Toxicant	NON-Toxic	1	1997.08 mg/kg	1997.08	0.701413	Irritant	Sensitizer	NON-Sensitizer	2		3.70141		0.2998 mg/L	0.2998	0.680983	10.68 mg/L	10.68	0.951702	0.8653 mg/L	0.8653	0.998663	2.63135	0.31 log(L/kg)	0.31	0.488889	-2.2	0.541181		3.66142			P5-I1	5.89788		CIP-P5-I1	5.72305		FLE-P5-I1	7.77291		LOM-5-1
MOX	NON-active	NON-active	Inactive	NON-Carcinogen	Inactive	NON-Mutagenic	0	Toxicant	Toxic	2	2026.26 mg/kg	2026.26	0.695754	Irritant	Sensitizer	NON-Sensitizer	2		4.69575		0.2782 mg/L	0.2782	0.720291	0.3767 mg/L	0.3767	0.998712	0.2165 mg/L	0.2165	1	2.719	0.44 log(L/kg)	0.44	0.633333	-1.71	0.637962		3.9903			P5-I2	5.85649		CIP-P5-I2	5.7265		FLE-P5-I2	6.6361		LOM-5-2
NAD	NON-active	NON-active	Inactive	NON-Carcinogen	Active	NON-Mutagenic	1	Toxicant	Toxic	2	2071.65 mg/kg	2071.65	0.68695	Irritant	Sensitizer	NON-Sensitizer	2		5.68695		0.3445 mg/L	0.3445	0.599636	12.79 mg/L	12.79	0.942075	13.99 mg/L	13.99	0.971612	2.51332	0.41 log(L/kg)	0.41	0.6	-2.05	0.570808		3.68413			parent molecule	5.667
NOR	NON-active	NON-active	Inactive	NON-Carcinogen	Active	Mutagenic	2	Toxicant	Toxic	2	1572.17 mg/kg	1572.17	0.783825	Irritant	Sensitizer	NON-Sensitizer	2		6.78383		0.302 mg/L	0.302	0.676979	41.19 mg/L	41.19	0.812499	0.9681 mg/L	0.9681	0.998451	2.48793	0.16 log(L/kg)	0.16	0.322222	-2.51	0.479953		3.2901						CLI-P2-I1	5.6867		GAT-1-1	2.61795		MOX-2
OFL	NON-active	NON-active	Inactive	NON-Carcinogen	Inactive	Mutagenic	2	Toxicant	NON-Toxic	1	1472.44 mg/Kg	1472.44	0.803168	Irritant	Sensitizer	NON-Sensitizer	2		5.80317		0.2655 mg/L	0.2655	0.743403	29.85 mg/L	29.85	0.864238	2.83 mg/L	2.83	0.994613	2.60225	0.16 log(L/kg)	0.16	0.322222	-2.97	0.389097		3.31357						CLI-P3-I1	6.68924		GAT-1-2	3.81055		MOX-3
PEF	NON-active	NON-active	Inactive	Carcinogen	Active	Mutagenic	3	Toxicant	Toxic	2	1963.37 mg/Kg	1963.37	0.707951	Irritant	Sensitizer	NON-Sensitizer	2		7.70795		0.3229 mg/L	0.3229	0.638944	39.65 mg/L	39.65	0.819525	4.21 mg/L	4.21	0.991769	2.45024	0.22 log(L/kg)	0.22	0.388889	-3.09	0.365396		3.20452						CLI-P5-I1	6.71654		GAT-1-3	3.81926		MOX-5-1
RUF	NON-active	NON-active	Inactive	NON-Carcinogen	Inactive	Mutagenic	1	Toxicant	Toxic	2	457.59 mg/Kg	457.59	1	Not Irritant	Sensitizer	NON-Sensitizer	1		5		0.309 mg/L	0.309	0.66424	20.71 mg/L	20.71	0.90594	3.01 mg/L	3.01	0.994243	2.56442	0.21 log(L/kg)	0.21	0.377778	-2.99	0.385147		3.32735						CLI-P5-I2	5.71449		GAT-2	3.71743		MOX-5-2
SPA	NON-active	NON-active	Inactive	NON-Carcinogen	Active	NON-Mutagenic	1	Toxicant	Toxic	2	2214.94 mg/kg	2214.94	0.659159	Irritant	Sensitizer	NON-Sensitizer	2		5.65916		0.4146 mg/L	0.4146	0.472066	0.8244 mg/L	0.8244	0.996669	0.4321 mg/L	0.4321	0.999556	2.46829	0.37 log(L/kg)	0.37	0.555556	-2.95	0.393048		3.41689									GAT-3	3.57913
TOS	NON-active	NON-active	Inactive	NON-Carcinogen	Active	Mutagenic	2	Toxicant	Toxic	2	2226.26 mg/kg	2226.26	0.656963	Irritant	NON-Sensitizer	NON-Sensitizer	1		5.65696		0.1405 mg/L	0.1405	0.970883	3.8 mg/L	3.8	0.983093	1.65 mg/L	1.65	0.997046	2.95102	0.77 log(L/kg)	0.77	1	-2.23	0.535256		4.48628						ENO-P1-I1	5.13645		GAT-4-1	3.70079		NAD-P2-1
GEM	NON-active	NON-active	Inactive	Carcinogen	Active	Mutagenic	3	NON-Toxicant	Toxic	1	4315.21 mg/kg	4315.21	0.251808	Irritant	NON-Sensitizer	NON-Sensitizer	1		5.25181		0.3261 mg/L	0.3261	0.633121	5.79 mg/L	5.79	0.974013	2.99 mg/L	2.99	0.994284	2.60142	0.27 log(L/kg)	0.27	0.444444	-3.05	0.373296		3.41916						ENO-P1-I2	5.66253		GAT-4-2	3.70645		NAD-P3-1
																			5.66681																		3.53546						ENO-P1-I3	5.5791		GAT-5-1	3.61369		NAD-P5-1
CIP-P1-I1	NON-active	NON-active	Inactive	Carcinogen	Inactive	NON-Mutagenic	1	Toxicant	Toxic	2	1792.07 mg/kg	1792.07	0.741175	NOT IRRITANT	Sensitizer	NON-Sensitizer	1		4.74118		0.2394 mg/L	0.2394	0.790901	3.84 mg/L	3.84	0.98291	0.5781 mg/L	0.5781	0.999255	2.77307	0.29 log(L/kg)	0.29	0.466667	-2.66	0.450326		3.69006						ENO-P2-I1	6.33843		GAT-5-2	2.61756		NAD-P5-2
CIP-P1-I2	NON-active	NON-active	Inactive	Carcinogen	Active	NON-Mutagenic	2	Toxicant	Toxic	2	1384.73 mg/kg	1384.73	0.82018	NOT IRRITANT	Sensitizer	NON-Sensitizer	1		5.82018		0.2559 mg/L	0.2559	0.760874	2.46 mg/L	2.46	0.989206	1.3 mg/L	1.3	0.997767	2.74785	0.37 log(L/kg)	0.37	0.555556	-2.87	0.408849		3.71225						ENO-P3-I1	5.66538
CIP-P1-I3	NON-active	NON-active	Inactive	Carcinogen	Active	NON-Mutagenic	2	Toxicant	Toxic	2	1384.73 mg/kg	1384.73	0.82018	NOT IRRITANT	Sensitizer	NON-Sensitizer	1		5.82018		0.2559 mg/L	0.2559	0.760874	2.46 mg/L	2.46	0.989206	1.3 mg/L	1.3	0.997767	2.74785	0.37 log(L/kg)	0.37	0.555556	-2.87	0.408849		3.71225						ENO-P4-I1	5.01327		LEV-1-1	3.6624		NOR-P1-1
CIP-P2-I1	NON-active	NON-active	Inactive	Carcinogen	Active	Mutagenic	3	Toxicant	Toxic	2	1942.56 mg/kg	1942.56	0.711987	IRRITANT	Sensitizer	NON-Sensitizer	2		7.71199		0.2271 mg/L	0.2271	0.813285	5.45 mg/L	5.45	0.975564	14.46 mg/L	14.46	0.970644	2.75949	0.2 log(L/kg)	0.2	0.366667	-3.77	0.231088		3.35725						ENO-P4-I2			LEV-1-2	3.8916		NOR-P1-2
CIP-P3-I1	NON-active	NON-active	Inactive	Carcinogen	Active	Mutagenic	3	Toxicant	Toxic	2	2030.32 mg/kg	2030.32	0.694966	NOT IRRITANT	Sensitizer	NON-Sensitizer	1		6.69497		0.3087 mg/L	0.3087	0.664786	0.8513 mg/L	0.8513	0.996546	12.42 mg/L	12.42	0.974848	2.63618	0.26 log(L/kg)	0.26	0.433333	-3.28	0.327869		3.39738						ENO-P5-I1	6.15203		LEV-1-3	3.89853		NOR-P1-3
CIP-P4-I1	NON-active	NON-active	Inactive	Carcinogen	Active	Mutagenic	3	Toxicant	Toxic	2	2027.88 mg/kg	2027.88	0.695439	NOT IRRITANT	Sensitizer	NON-Sensitizer	1		6.69544		0.2202 mg/L	0.2202	0.825842	4.62 mg/L	4.62	0.979351	11.73 mg/L	11.73	0.97627	2.78146	0.26 log(L/kg)	0.26	0.433333	-3.26	0.331819		3.54662						ENO-P5-I2	6		LEV-2	5.62934		NOR-P2-1
CIP-P4-I2	NON-active	NON-active	Inactive	Carcinogen	Active	Mutagenic	3	Toxicant	Toxic	2	2010.25 mg/kg	2010.25	0.698859	NOT IRRITANT	Sensitizer	NON-Sensitizer	1		6.69886		0.2319 mg/L	0.2319	0.80455	3.22 mg/L	3.22	0.985739	0.7983 mg/L	0.7983	0.998801	2.78909	0.24 log(L/kg)	0.24	0.411111	-3.33	0.317993		3.51819									LEV-3	6.80317		NOR-P3-1
CIP-P5-I1	NON-active	NON-active	Inactive	NON-Carcinogen	Active	Mutagenic	2	Toxicant	Unknown	2	1885.53 mg/kg	1885.53	0.723048	NOT IRRITANT	Sensitizer	NON-Sensitizer	1		5.72305		0.1509 mg/L	0.1509	0.951956	3.56 mg/L	3.56	0.984188	0.6168 mg/L	0.6168	0.999175	2.93532	0.59 log(L/kg)	0.59	0.8	-2.13	0.555007		4.29033									LEV-4-1	4.60663		NOR-P4-1
CIP-P5-I2	NON-active	NON-active	Inactive	NON-Carcinogen	Active	Mutagenic	2	Toxicant	Unknown	2	1867.71 mg/kg	1867.71	0.726505	NOT IRRITANT	Sensitizer	NON-Sensitizer	1		5.7265		0.1883 mg/L	0.1883	0.883894	6.67 mg/L	6.67	0.969998	13.87 mg/L	13.87	0.97186	2.82575	0.3 log(L/kg)	0.3	0.477778	-3.3	0.323919		3.62745									LEV-4-2	4.61246		NOR-P4-2
						2	2.33333		2	2	1957.89	1813.98				2	1.11111	6.29099	6.18137										2.83214	2.77734		0.5	0.5	0.460201	0.372858	3.79234	3.6502									LEV-5-1	5.65967		NOR-P5-1
CLI-P2-I1	NON-active	NON-active	Inactive	Carcinogen	Inactive	Mutagenic	2	Toxicant	Toxic	2	2072.92 mg/kg	2072.92	0.686704	NOT IRRITANT	Sensitizer	NON-Sensitizer	1		5.6867		0.219 mg/L	0.219	0.828025	2 mg/L	2	0.991305	8.08 mg/L	8.08	0.983793	2.80312	-0.05 log(L/kg)	-0.05	0.0888889	-3.65	0.25479		3.1468									LEV-5-2	6.66394		NOR-P5-2
CLI-P3-I1	NON-active	NON-active	Inactive	Carcinogen	Active	Mutagenic	3	Toxicant	Toxic	2	2059.86 mg/kg	2059.86	0.689237	NOT IRRITANT	Sensitizer	NON-Sensitizer	1		6.68924		0.2224 mg/L	0.2224	0.821838	1.25 mg/L	1.25	0.994727	0.386 mg/L	0.386	0.999651	2.81622	0.22 log(L/kg)	0.22	0.388889	-2.48	0.485878		3.69098
CLI-P5-I1	NON-active	NON-active	Inactive	Carcinogen	Active	Mutagenic	3	Toxicant	Unknown	2	1919.11 mg/kg	1919.11	0.716536	NOT IRRITANT	Sensitizer	NON-Sensitizer	1		6.71654		0.1663 mg/L	0.1663	0.923931	4.36 mg/L	4.36	0.980538	0.6163 mg/L	0.6163	0.999176	2.90364	0.13 log(L/kg)	0.13	0.288889	-2.33	0.515505		3.70804		Eco Toxicity		average value
CLI-P5-I2	NON-active	NON-active	Inactive	Carcinogen	Inactive	Mutagenic	2	Toxicant	Unknown	2	1929.68 mg/kg	1929.68	0.714485	NOT IRRITANT	Sensitizer	NON-Sensitizer	1		5.71449		0.1596 mg/L	0.1596	0.936124	7.07 mg/L	7.07	0.968173	12.52 mg/L	12.52	0.974642	2.87894	-0.13 log(L/kg)	-0.13	0	-3.5	0.284416		3.16336			P1-I1	3.39191		CIP-P1-I1	3.69006		FLE-P1-I1	3.66008		LOM-1-1
						1	2.5		2	2	2059.86	1995.39				2	1	5.31076	6.20174										2.81622	2.85048		0.388889	0.191667	0.485878	0.385147	3.69098	3.42729			P1-I2	3.3237		CIP-P1-I2	3.71225		FLE-P1-I2	3.31448		LOM-1-2
ENO-P1-I1	NON-active	NON-active	Inactive	Carcinogen	Inactive	Mutagenic	2	Toxicant	Toxic	2	4910 mg/kg	4910	0.136447	NOT IRRITANT	Sensitizer	NON-Sensitizer	1		5.13645		0.674 mg/L	0.674	0	51.03 mg/L	51.03	0.767603	6.48 mg/L	6.48	0.987091	1.75469	0.07 log(L/kg)	0.07	0.222222	-3.3	0.323919		2.30083			P1-I3	2.77519		CIP-P1-I3	3.71225		FLE-P1-I3	2.74537		LOM-1-3
ENO-P1-I2	NON-active	NON-active	Inactive	Carcinogen	Inactive	Mutagenic	2	Toxicant	Toxic	2	2197.55 mg/kg	2197.55	0.662532	NOT IRRITANT	Sensitizer	NON-Sensitizer	1		5.66253		0.5789 mg/L	0.5789	0.173066	32.19 mg/L	32.19	0.853562	14.32 mg/L	14.32	0.970932	1.99756	0.08 log(L/kg)	0.08	0.233333	-3.51	0.282441		2.51333			P2-I1	2.94902		CIP-P2-I1	3.35725		FLE-P2-I1	2.85816		LOM-2
ENO-P1-I3	NON-active	NON-active	Inactive	Carcinogen	Inactive	Mutagenic	2	Toxicant	Toxic	2	2627.72 mg/kg	2627.72	0.579099	NOT IRRITANT	Sensitizer	NON-Sensitizer	1		5.5791		0.6105 mg/L	0.6105	0.11556	53.56 mg/L	53.56	0.75606	365.09 mg/L	365.09	0.247984	1.1196	0.06 log(L/kg)	0.06	0.211111	-4.68	0.051353		1.38207			P3-I1	3.37645		CIP-P3-I1	3.39738		FLE-P3-I1	3.32358		LOM-3
ENO-P2-I1	NON-active	NON-active	Inactive	Carcinogen	Active	Mutagenic	3	Toxicant	Toxic	2	3868.58 mg/kg	3868.58	0.338432	NOT IRRITANT	Sensitizer	NON-Sensitizer	1		6.33843		0.5582 mg/L	0.5582	0.210737	69.71 mg/L	69.71	0.682375	176.19 mg/L	176.19	0.637313	1.53042	0.12 log(L/kg)	0.12	0.277778	-4.37	0.112581		1.92078			P4-I1	3.04748		CIP-P4-I1	3.54662		FLE-P4-I1	3.09186		LOM-4-1
ENO-P3-I1	NON-active	NON-active	Inactive	Carcinogen	Inactive	Mutagenic	2	Toxicant	Toxic	2	2182.86 mg/kg	2182.86	0.665381	NOT IRRITANT	Sensitizer	NON-Sensitizer	1		5.66538		0.2179 mg/L	0.2179	0.830027	4.02 mg/L	4.02	0.982089	44.24 mg/L	44.24	0.909266	2.72138	0.22 log(L/kg)	0.22	0.388889	-3.86	0.213312		3.32358			P4-I2	2.9796		CIP-P4-I2	3.51819		FLE-P4-I2	2.87761		LOM-4-2
ENO-P4-I1	NON-active	NON-active	Inactive	Carcinogen	Inactive	Mutagenic	2	Toxicant	Toxic	2	5545.07 mg/kg	5545.07	0.0132741	NOT IRRITANT	Sensitizer	NON-Sensitizer	1		5.01327		0.4154 mg/L	0.4154	0.47061	60.59 mg/L	60.59	0.723985	133.45 mg/L	133.45	0.725401	1.92	0.13 log(L/kg)	0.13	0.288889	-3.86	0.213312		2.4222			P5-I1	3.40672		CIP-P5-I1	4.29033		FLE-P5-I1	3.12899		LOM-5-1
ENO-P4-I2	NON-active	NON-active	Inactive	Carcinogen	Inactive	Mutagenic	2	Toxicant	Toxic	2	N/A	N/A		NOT IRRITANT	Sensitizer	NON-Sensitizer	1				0.3845 mg/L	0.3845	0.526843	188.96 mg/L	188.96	0.138291	311.11 mg/L	311.11	0.359238	1.02437	0.19 log(L/kg)	0.19	0.355556	-4.94	0		1.37993			P5-I2	2.62628		CIP-P5-I2	3.62745		FLE-P5-I2	2.46333		LOM-5-2
ENO-P5-I1	NON-active	NON-active	Inactive	Carcinogen	Active	Mutagenic	3	Toxicant	Toxic	2	4829.66 mg/kg	4829.66	0.152029	NOT IRRITANT	Sensitizer	NON-Sensitizer	1		6.15203		0.4029 mg/L	0.4029	0.493358	136 mg/L	136	0.379924	10.46 mg/L	10.46	0.978888	1.85217	0.12 log(L/kg)	0.12	0.277778	-3.04	0.375272		2.50522			parent molecule	3.535
ENO-P5-I2	NON-active	NON-active	Inactive	Carcinogen	Active	Mutagenic	3	Toxicant	Toxic	2	5613.51 mg/kg	5613.51	0	NOT IRRITANT	Sensitizer	NON-Sensitizer	1		6		0.4868 mg/L	0.4868	0.340673	219.27 mg/L	219.27	0	255.01 mg/L	255.01	0.474862	0.815535	0.13 log(L/kg)	0.13	0.288889	-4.21	0.144183		1.24861						CLI-P2-I1	3.1468		GAT-1-1	3.68936		MOX-2
						2	2.33333		2	2	5325.73	3971.87				2	1	6.05582	5.6934										2.11714	1.6373		0.3	0.282716	0.412799	0.190708	2.82994	2.11073						CLI-P3-I1	3.69098		GAT-1-2	3.6369		MOX-3
FLE-P1-I1	NON-active	NON-active	Inactive	Carcinogen	Active	NON-Mutagenic	2	Toxicant	Toxic	2	1937.95 mg/kg	1937.95	0.712882	NOT IRRITANT	Sensitizer	NON-Sensitizer	1		5.71288		0.3383 mg/L	0.3383	0.610919	13.07 mg/L	13.07	0.940798	0.442 mg/L	0.442	0.999535	2.55125	0.34 log(L/kg)	0.34	0.522222	-1.97	0.586609		3.66008						CLI-P5-I1	3.70804		GAT-1-3	3.26479		MOX-5-1
FLE-P1-I2	NON-active	NON-active	Inactive	Carcinogen	Inactive	NON-Mutagenic	1	NON-Toxicant	Toxic	1	857.75 mg/kg	857.75	0.922388	NOT IRRITANT	Sensitizer	NON-Sensitizer	1		3.92239		0.5312 mg/L	0.5312	0.259873	13.66 mg/L	13.66	0.938106	1.17 mg/L	1.17	0.998035	2.19601	0.45 log(L/kg)	0.45	0.644444	-2.54	0.474027		3.31448						CLI-P5-I2	3.16336		GAT-2	3.2963		MOX-5-2
FLE-P1-I3	NON-active	NON-active	Inactive	Carcinogen	Inactive	NON-Mutagenic	1	NON-Toxicant	Toxic	1	830.83 mg/kg	830.83	0.927609	NOT IRRITANT	Sensitizer	NON-Sensitizer	1		3.92761		0.4761 mg/L	0.4761	0.360146	20.71 mg/L	20.71	0.90594	25.71 mg/L	25.71	0.947457	2.21354	0.13 log(L/kg)	0.13	0.288889	-3.71	0.242939		2.74537									GAT-3	3.77713
FLE-P2-I1	NON-active	NON-active	Inactive	Carcinogen	Active	Mutagenic	3	Toxicant	Toxic	2	2527.83 mg/kg	2527.83	0.598473	NOT IRRITANT	Sensitizer	NON-Sensitizer	1		6.59847		0.3047 mg/L	0.3047	0.672066	24.24 mg/L	24.24	0.889834	52.22 mg/L	52.22	0.892819	2.45472	0.13 log(L/kg)	0.13	0.288889	-4.36	0.114557		2.85816						ENO-P1-I1	2.30083		GAT-4-1	3.46264		NAD-P2-1
FLE-P3-I1	NON-active	NON-active	Inactive	Carcinogen	Inactive	Mutagenic	2	Toxicant	Toxic	2	2182.86 mg/kg	2182.86	0.665381	NOT IRRITANT	Sensitizer	NON-Sensitizer	1		5.66538		0.2179 mg/L	0.2179	0.830027	4.02 mg/L	4.02	0.982089	44.24 mg/L	44.24	0.909266	2.72138	0.22 log(L/kg)	0.22	0.388889	-3.86	0.213312		3.32358						ENO-P1-I2	2.51333		GAT-4-2	3.15285		NAD-P3-1
FLE-P4-I1	NON-active	NON-active	Inactive	Carcinogen	Active	Mutagenic	3	Toxicant	Toxic	2	2182.77 mg/kg	2182.77	0.665398	NOT IRRITANT	NON-Sensitizer	NON-Sensitizer	0		5.6654		0.2945 mg/L	0.2945	0.690628	18.54 mg/L	18.54	0.915841	47.07 mg/L	47.07	0.903433	2.5099	0.2 log(L/kg)	0.2	0.366667	-3.85	0.215287		3.09186						ENO-P1-I3	1.38207		GAT-5-1	3.7811		NAD-P5-1
FLE-P4-I2	NON-active	NON-active	Inactive	Carcinogen	Active	Mutagenic	3	Toxicant	Toxic	2	2619.1 mg/kg	2619.1	0.580771	IRRITANT	NON-Sensitizer	NON-Sensitizer	1		6.58077		0.3354 mg/L	0.3354	0.616197	27.17 mg/L	27.17	0.876466	37.1 mg/L	37.1	0.923982	2.41664	0.1 log(L/kg)	0.1	0.255556	-3.9	0.205412		2.87761						ENO-P2-I1	1.92078		GAT-5-2	3.39059		NAD-P5-2
FLE-P5-I1	NON-active	NON-active	Inactive	Carcinogen	Active	Mutagenic	3	Toxicant	Unknown	2	1628.43 mg/kg	1628.43	0.772913	IRRITANT	Sensitizer	NON-Sensitizer	2		7.77291		0.3513 mg/L	0.3513	0.587261	52.13 mg/L	52.13	0.762585	3.73 mg/L	3.73	0.992759	2.3426	0.24 log(L/kg)	0.24	0.411111	-3.04	0.375272		3.12899						ENO-P3-I1	3.32358
FLE-P5-I2	NON-active	NON-active	Inactive	Carcinogen	Active	Mutagenic	3	Toxicant	Unknown	2	2333.82 mg/kg	2333.82	0.636102	NOT IRRITANT	Sensitizer	NON-Sensitizer	1		6.6361		0.3253 mg/L	0.3253	0.634577	86.15 mg/L	86.15	0.607367	76.93 mg/L	76.93	0.841891	2.08383	0.08 log(L/kg)	0.08	0.233333	-4.2	0.146158		2.46333						ENO-P4-I1	2.4222		LEV-1-1	3.42806		NOR-P1-1
						2	2.33333		2	1.71429	2096.69	1900.15				2	1	6.68209	5.83132										2.53443	2.38777		0.477778	0.377778	0.357496	0.285953	3.36971	3.0515						ENO-P4-I2	1.37993		LEV-1-2	3.46296		NOR-P1-2
GAT-1-1	NON-active	NON-active	Inactive	NON-Carcinogen	Inactive	NON-Mutagenic	0	Toxicant	Toxic	2	2427.42 mg/kg	2427.42	0.617948	NOT IRRITANT	NON-Sensitizer	NON-Sensitizer	0		2.61795		0.2497 mg/L	0.2497	0.772157	1.52 mg/L	1.52	0.993495	0.4323 mg/L	0.4323	0.999555	2.76521	0.3 log(L/kg)	0.3	0.477778	-2.68	0.446376		3.68936						ENO-P5-I1	2.50522		LEV-1-3	3.05628		NOR-P1-3
GAT-1-2	NON-active	NON-active	Inactive	NON-Carcinogen	Inactive	Mutagenic	1	Toxicant	Toxic	2	1434.36 mg/kg	1434.36	0.810554	NOT IRRITANT	NON-Sensitizer	NON-Sensitizer	0		3.81055		0.2479 mg/L	0.2479	0.775432	1.62 mg/L	1.62	0.993039	1.02 mg/L	1.02	0.998344	2.76682	0.31 log(L/kg)	0.31	0.488889	-3.01	0.381197		3.6369						ENO-P5-I2	1.24861		LEV-2	2.54797		NOR-P2-1
GAT-1-3	NON-active	NON-active	Inactive	NON-Carcinogen	Inactive	Mutagenic	1	Toxicant	Toxic	2	1389.48 mg/kg	1389.48	0.819258	NOT IRRITANT	NON-Sensitizer	NON-Sensitizer	0		3.81926		0.2175 mg/L	0.2175	0.830755	2.48 mg/L	2.48	0.989115	24.3 mg/L	24.3	0.950363	2.77023	0.18 log(L/kg)	0.18	0.344444	-4.18	0.150109		3.26479									LEV-3	3.31357		NOR-P3-1
GAT-2	NON-active	NON-active	Inactive	NON-Carcinogen	Inactive	NON-Mutagenic	0	Toxicant	Toxic	2	1914.51 mg/kg	1914.51	0.717428	IRRITANT	NON-Sensitizer	NON-Sensitizer	1		3.71743		0.2912 mg/L	0.2912	0.696633	2.1 mg/L	2.1	0.990849	10.78 mg/L	10.78	0.978228	2.66571	0.21 log(L/kg)	0.21	0.377778	-3.66	0.252815		3.2963									LEV-4-1	2.88681		NOR-P4-1
GAT-3	NON-active	NON-active	Inactive	NON-Carcinogen	Inactive	NON-Mutagenic	0	Toxicant	Toxic	2	2627.57 mg/kg	2627.57	0.579128	IRRITANT	NON-Sensitizer	NON-Sensitizer	1		3.57913		0.2348 mg/L	0.2348	0.799272	1.31 mg/L	1.31	0.994453	0.4579 mg/L	0.4579	0.999502	2.79323	0.32 log(L/kg)	0.32	0.5	-2.49	0.483903		3.77713									LEV-4-2	2.9346		NOR-P4-2
GAT-4-1	NON-active	NON-active	Inactive	NON-Carcinogen	Inactive	NON-Mutagenic	0	Toxicant	Toxic	2	2000.27 mg/kg	2000.27	0.700794	IRRITANT	NON-Sensitizer	NON-Sensitizer	1		3.70079		0.2829 mg/L	0.2829	0.711738	1.72 mg/L	1.72	0.992583	8.68 mg/L	8.68	0.982556	2.68688	0.25 log(L/kg)	0.25	0.422222	-3.15	0.353545		3.46264									LEV-5-1	2.62419		NOR-P5-1
GAT-4-2	NON-active,	NON-active	Inactive	NON-Carcinogen	Inactive	NON-Mutagenic	0	Toxicant	Toxic	2	1971.09 mg/kg	1971.09	0.706454	IRRITANT	NON-Sensitizer	NON-Sensitizer	1		3.70645		0.2639 mg/L	0.2639	0.746315	1.72 mg/L	1.72	0.992583	13.81 mg/L	13.81	0.971983	2.71088	0.17 log(L/kg)	0.17	0.333333	-4.39	0.108631		3.15285									LEV-5-2	1.81427		NOR-P5-2
GAT-5-1	NON-active	NON-active	Inactive	NON-Carcinogen	Inactive	NON-Mutagenic	0	Toxicant	Unknown	2	2449.35 mg/kg	2449.35	0.613695	IRRITANT	NON-Sensitizer	NON-Sensitizer	1		3.61369		0.2036 mg/L	0.2036	0.856051	4.66 mg/L	4.66	0.979169	0.694 mg/L	0.694	0.999016	2.83424	0.26 log(L/kg)	0.26	0.433333	-2.34	0.51353		3.7811
GAT-5-2	NON-active	NON-active	Inactive	NON-Carcinogen	Inactive	NON-Mutagenic	0	Toxicant	Unknown	2	2429.4 mg/kg	2429.4	0.617564	NOT IRRITANT	NON-Sensitizer	NON-Sensitizer	0		2.61756		0.212 mg/L	0.212	0.840764	7.64 mg/L	7.64	0.965572	15.51 mg/L	15.51	0.96848	2.77482	0.17 log(L/kg)	0.17	0.333333	-3.51	0.282441		3.39059
						1	0.222222		2	2	2627.57	2071.49				2	0.555556	5.57913	3.46476										2.79323	2.752		0.5	0.412346	0.483903	0.330283	3.77713	3.49463
LEV-1-1	NON-active	NON-active	Inactive	NON-Carcinogen	Inactive	NON-Mutagenic	0	Toxicant	Toxic	2	2198.21 mg/kg	2198.21	0.662404	IRRITANT	NON-Sensitizer	NON-Sensitizer	1		3.6624		0.3499 mg/L	0.3499	0.589809	22.25 mg/L	22.25	0.898914	0.506 mg/L	0.506	0.999403	2.48813	0.14 log(L/kg)	0.14	0.3	-1.7	0.639937		3.42806
LEV-1-2	NON-active	NON-active	Inactive	NON-Carcinogen	Inactive	Mutagenic	1	Toxicant	Toxic	2	1016.49 mg/kg	1016.49	0.8916	NOT IRRITANT	NON-Sensitizer	NON-Sensitizer	0		3.8916		0.2732 mg/L	0.2732	0.72939	20.58 mg/L	20.58	0.906533	1.33 mg/L	1.33	0.997705	2.63363	0.14 log(L/kg)	0.14	0.3	-2.26	0.52933		3.46296
LEV-1-3	NON-active	NON-active	Inactive	NON-Carcinogen	Inactive	Mutagenic	1	Toxicant	Toxic	2	980.77 mg/kg	980.77	0.898528	NOT IRRITANT	NON-Sensitizer	NON-Sensitizer	0		3.89853		0.2755 mg/L	0.2755	0.725205	31.9 mg/L	31.9	0.854885	32.48 mg/L	32.48	0.933504	2.51359	0.09 log(L/kg)	0.09	0.244444	-3.43	0.298242		3.05628
LEV-2	NON-active	NON-active	Inactive	NON-Carcinogen	Inactive	Mutagenic	1	Toxicant	Toxic	2	2368.67 mg/kg	2368.67	0.629343	IRRITANT	Sensitizer	NON-Sensitizer	2		5.62934		0.4391 mg/L,	0.4391	0.42748	48.28 mg/L	48.28	0.78015	68.45 mg/L	68.45	0.859368	2.067	0.15 log(L/kg)	0.15	0.311111	-4.08	0.16986		2.54797
LEV-3	NON-active	NON-active	Inactive	NON-Carcinogen	Active	Mutagenic	2	Toxicant	Unknown	2	1472.44 mg/Kg	1472.44	0.803168	IRRITANT	Sensitizer	NON-Sensitizer	2		6.80317		0.2655 mg/L	0.2655	0.743403	29.85 mg/L	29.85	0.864238	2.83 mg/L	2.83	0.994613	2.60225	0.16 log(L/kg)	0.16	0.322222	-2.97	0.389097		3.31357
LEV-4-1	NON-active	NON-active	Inactive	NON-Carcinogen	Inactive	Mutagenic	1	Toxicant	Toxic	2	2485.77 mg/kg	2485.77	0.606631	IRRITANT	NON-Sensitizer	NON-Sensitizer	1		4.60663		0.3457 mg/L	0.3457	0.597452	37.09 mg/L	37.09	0.831205	54.77 mg/L	54.77	0.887563	2.31622	0.14 log(L/kg)	0.14	0.3	-3.57	0.270591		2.88681
LEV-4-2	NON-active	NON-active	Inactive	NON-Carcinogen	Inactive	Mutagenic	1	Toxicant	Toxic	2	2455.72 mg/kg	2455.72	0.612459	IRRITANT	NON-Sensitizer	NON-Sensitizer	1		4.61246		0.2827 mg/L	0.2827	0.712102	54.82 mg/L	54.82	0.750311	48.56 mg/L	48.56	0.900362	2.36278	0.15 log(L/kg)	0.15	0.311111	-3.62	0.260715		2.9346
LEV-5-1	NON-active	NON-active	Inactive	Carcinogen	Inactive	Mutagenic	2	Toxicant	Unknown	2	2212.32 mg/kg	2212.32	0.659667	NOT IRRITANT	Sensitizer	NON-Sensitizer	1		5.65967		0.4376 mg/L	0.4376	0.430209	106.13 mg/L	106.13	0.516207	4.27 mg/L	4.27	0.991646	1.93806	0.1 log(L/kg)	0.1	0.255556	-2.76	0.430575		2.62419
LEV-5-2	NON-active	NON-active	Inactive	Carcinogen	Inactive	Mutagenic	2	Toxicant	Unknown	2	2190.29 mg/kg	2190.29	0.66394	IRRITANT	Sensitizer	NON-Sensitizer	2		6.66394		0.4948 mg/L	0.4948	0.326115	174.7 mg/L	174.7	0.203353	98.99 mg/L	98.99	0.796425	1.32589	0.13 log(L/kg)	0.13	0.288889	-3.93	0.199486		1.81427
						1	1.22222		1	2	1472.44	1931.19				2	1.11111	4.80317	5.04753										2.60225	2.24973		0.322222	0.292593	0.389097	0.354204	3.31357	2.89652
LOM-1-1	NON-active	NON-active	Inactive	NON-Carcinogen	Active	NON-Mutagenic	1	Toxicant	Toxic	2	1827.87 mg/kg	1827.87	0.734232	IRRITANT	Sensitizer	NON-Sensitizer	2		5.73423		0.316 mg/L	0.316	0.651501	13.22 mg/L	13.22	0.940113	0.8366 mg/L	0.8366	0.998722	2.59034	0.35 log(L/kg)	0.35	0.533333	-2.19	0.543156		3.66683
LOM-1-2	NON-active	NON-active	Inactive	NON-Carcinogen	Active	Mutagenic	2	Toxicant	Toxic	2	808.09 mg/kg	808.09	0.93202	NOT IRRITANT	Sensitizer	NON-Sensitizer	1		5.93202		0.4668 mg/L	0.4668	0.37707	13.7 mg/L	13.7	0.937923	1.89 mg/L	1.89	0.996551	2.31154	0.42 log(L/kg)	0.42	0.611111	-2.53	0.476002		3.39866
LOM-1-3	NON-active	NON-active	Inactive	NON-Carcinogen	Active	Mutagenic	2	Toxicant	Toxic	2	782.65 mg/kg	782.65	0.936954	NOT IRRITANT	Sensitizer	NON-Sensitizer	1		5.93695		0.4109 mg/L	0.4109	0.478799	21.08 mg/L	21.08	0.904252	43.56 mg/L	43.56	0.910668	2.29372	0.13 log(L/kg)	0.13	0.288889	-3.7	0.244914		2.82752
LOM-2	NON-active	NON-active	Inactive	NON-Carcinogen	Active	NON-Mutagenic	1	Toxicant	Toxic	2	2418.69 mg/kg	2418.69	0.619641	IRRITANT	Sensitizer	NON-Sensitizer	2		5.61964		0.2998 mg/L,	0.2998	0.680983	17.15 mg/L	17.15	0.922183	19.48 mg/L	19.48	0.960297	2.56346	0.15 log(L/kg)	0.15	0.311111	-3.18	0.34762		3.22219
LOM-3	NON-active	NON-active	Inactive	NON-Carcinogen	Inactive	NON-Mutagenic	0	Toxicant	Toxic	2	2081.69 mg/kg	2081.69	0.685003	IRRITANT	Sensitizer	NON-Sensitizer	2		4.685		0.2534 mg/L	0.2534	0.765423	2.87 mg/L	2.87	0.987336	16.4 mg/L	16.4	0.966645	2.7194	0.24 log(L/kg)	0.24	0.411111	-2.68	0.446376		3.57689
LOM-4-1	NON-active	NON-active	Inactive	NON-Carcinogen	Active	NON-Mutagenic	1	Toxicant	Toxic	2	2083.63 mg/kg	2083.63	0.684627	IRRITANT	Sensitizer	NON-Sensitizer	2		5.68463		0.2627 mg/L	0.2627	0.748499	14.04 mg/L	14.04	0.936372	16.47 mg/L	16.47	0.966501	2.65137	0.22 log(L/kg)	0.22	0.388889	-2.67	0.448351		3.48861
LOM-4-2	NON-active	NON-active	Inactive	Carcinogen	Active	NON-Mutagenic	2	Toxicant	Toxic	2	2510.2 mg/kg	2510.2	0.601893	IRRITANT	Sensitizer	NON-Sensitizer	2		6.60189		0.3347 mg/L	0.3347	0.61747	14.01 mg/L	14.01	0.936509	24.62 mg/L	24.62	0.949704	2.50368	0.13 log(L/kg)	0.13	0.288889	-3.91	0.203437		2.99601
LOM-5-1	NON-active	NON-active	Inactive	NON-Carcinogen	Active	NON-Mutagenic	1	Toxicant	Unknown	2	1858.29 mg/kg	1858.29	0.728332	IRRITANT	Sensitizer	NON-Sensitizer	2		5.72833		0.2422 mg/L	0.2422	0.785805	37.27 mg/L	37.27	0.830384	1.34 mg/L	1.34	0.997684	2.61387	0.25 log(L/kg)	0.25	0.422222	-1.86	0.608335		3.64443
LOM-5-2	NON-active	NON-active	Inactive	NON-Carcinogen	Active	Mutagenic	2	Toxicant	Unknown	2	2240.07 mg/kg	2240.07	0.654285	IRRITANT	Sensitizer	NON-Sensitizer	2		6.65428		0.2714 mg/L	0.2714	0.732666	61.11 mg/L	61.11	0.721613	28.18 mg/L	28.18	0.942366	2.39665	0.11 log(L/kg)	0.11	0.266667	-3.02	0.379222		3.04253
						0	1.33333		1	2	1997.08	1845.69				2	1.77778	3.70141	5.84189										2.63135	2.516		0.488889	0.391358	0.541181	0.410824	3.66142	3.31819
MOX-2	NON-active	NON-active	Inactive	NON-Carcinogen	Inactive	NON-Mutagenic	0	Toxicant	Toxic	2	2010.18 mg/kg	2010.18	0.698872	IRRITANT	Sensitizer	NON-Sensitizer	2		4.69887		0.2483 mg/L	0.2483	0.774704	0.5996 mg/L	0.5996	0.997695	5.06 mg/L	5.06	0.990017	2.76242	0.27 log(L/kg)	0.27	0.444444	-2.88	0.406873		3.61373
MOX-3	NON-active	NON-active	Inactive	NON-Carcinogen	Inactive	NON-Mutagenic	0	Toxicant	Toxic	2	2106.84 mg/kg	2106.84	0.680125	IRRITANT	NON-Sensitizer	NON-Sensitizer	1		3.68012		0.2535 mg/L	0.2535	0.765241	0.0943 mg/L,	0.0943	1	4.14 mg/L	4.14	0.991914	2.75715	0.36 log(L/kg)	0.36	0.544444	-2.38	0.505629		3.80723
MOX-5-1	NON-active	NON-active	Inactive	NON-Carcinogen	Inactive	NON-Mutagenic	0	Toxicant	Toxic	2	1920.58 mg/kg	1920.58	0.71625	IRRITANT	Sensitizer	NON-Sensitizer	2		4.71625		0.2275 mg/L	0.2275	0.812557	1.31 mg/L	1.31	0.994453	0.3298 mg/L	0.3298	0.999766	2.80678	0.39 log(L/kg)	0.39	0.577778	-1.56	0.667588		4.05214
MOX-5-2	NON-active	NON-active	Inactive	NON-Carcinogen	Inactive	NON-Mutagenic	0	Toxicant	Toxic	2	1902.65 mg/kg	1902.65	0.719728	IRRITANT	Sensitizer	NON-Sensitizer	2		4.71973		0.2326 mg/L	0.2326	0.803276	2.13 mg/L	2.13	0.990712	7.28 mg/L	7.28	0.985442	2.77943	0.24 log(L/kg)	0.24	0.411111	-2.72	0.438475		3.62902
						0	0		2	2	2026.26	1985.06				2	1.75	4.69575	4.45374										2.719	2.77644		0.633333	0.494444	0.637962	0.504642	3.9903	3.77553
NAD-P2-1	NON-active	NON-active	Inactive	NON-Carcinogen	Active	NON-Mutagenic	1	Toxicant	Toxic	2	2066.52 mg/kg	2066.52	0.687945	IRRITANT	Sensitizer	NON-Sensitizer	2		5.68795		0.3511 mg/L	0.3511	0.587625	19.35 mg/L	19.35	0.912145	321.58 mg/L	321.58	0.337659	1.83743	0.25 log(L/kg)	0.25	0.422222	0.123	1		3.25965
NAD-P3-1	NON-active	NON-active	Inactive	NON-Carcinogen	Inactive	NON-Mutagenic	0	Toxicant	Toxic	2	2136.49 mg/kg	2136.49	0.674374	IRRITANT	Sensitizer	NON-Sensitizer	2		4.67437		0.2296 mg/L	0.2296	0.808735	3.14 mg/L	3.14	0.986104	275.3 mg/L	275.3	0.433044	2.22788	0.31 log(L/kg)	0.31	0.488889	-2.59	0.464152		3.18092
NAD-P5-1	NON-active	NON-active	Inactive	Carcinogen	Active	NON-Mutagenic	2	Toxicant	Unknown	2	1917.34 mg/kg	1917.34	0.716879	IRRITANT	Sensitizer	NON-Sensitizer	2		6.71688		0.2687 mg/L	0.2687	0.73758	37.85 mg/L	37.85	0.827738	21.53 mg/L	21.53	0.956072	2.52139	0.33 log(L/kg)	0.33	0.511111	-1.77	0.626111		3.65861
NAD-P5-2	NON-active	NON-active	Inactive	Carcinogen	Active	Mutagenic	3	Toxicant	Unknown	2	1910.11 mg/kg	1910.11	0.718281	IRRITANT	Sensitizer	NON-Sensitizer	2		7.71828		0.2588 mg/L	0.2588	0.755596	58.76 mg/L	58.76	0.732335	485.41 mg/L	485.41	0	1.48793	0.19 log(L/kg)	0.19	0.355556	-2.94	0.395023		2.23851
						1	1.5		2	2	2071.65	2007.62				2	2	5.68695	6.19937										2.51332	2.01866		0.6	0.444444	0.570808	0.621321	3.68413	3.08442
NOR-P1-1	NON-active	NON-active	Inactive	NON-Carcinogen	Active	Mutagenic	2	Toxicant	Toxic	2	1444.1 mg/kg	1444.1	0.808665	NOT IRRITANT	Sensitizer	NON-Sensitizer	1		5.80866		0.4347 mg/L	0.4347	0.435487	47.33 mg/L	47.33	0.784485	0.9155 mg/L	0.9155	0.998559	2.21853	0.17 log(L/kg)	0.17	0.333333	-2.34	0.51353		3.06539
NOR-P1-2	NON-active	NON-active	Inactive	Carcinogen	Active	Mutagenic	3	Toxicant	Toxic	2	734.14 mg/kg	734.14	0.946363	NOT IRRITANT	Sensitizer	NON-Sensitizer	1		6.94636		0.467 mg/L	0.467	0.376706	28.76 mg/L	28.76	0.869211	2.07 mg/L	2.07	0.99618	2.2421	0.26 log(L/kg)	0.26	0.433333	-2.55	0.472052		3.14748
NOR-P1-3	NON-active	NON-active	Inactive	Carcinogen	Active	Mutagenic	3	Toxicant	Toxic	2	711.2 mg/kg	711.2	0.950812	NOT IRRITANT	Sensitizer	NON-Sensitizer	1		6.95081		0.5637 mg/L	0.5637	0.200728	48.35 mg/L	48.35	0.779831	49.34 mg/L	49.34	0.898755	1.87931	0.07 log(L/kg)	0.07	0.222222	-3.72	0.240964		2.3425
NOR-P2-1	NON-active	NON-active	Inactive	NON-Carcinogen	Active	Mutagenic	2	Toxicant	Toxic	2	2203.81 mg/kg	2203.81	0.661317	IRRITANT	Sensitizer	NON-Sensitizer	2		6.66132		0.4667 mg/L	0.4667	0.377252	68.29 mg/L	68.29	0.688854	22.9 mg/L	22.9	0.953249	2.01935	0.12 log(L/kg)	0.12	0.277778	-3.46	0.292317		2.58945
NOR-P3-1	NON-active	NON-active	Inactive	NON-Carcinogen	Active	Mutagenic	2	Toxicant	Toxic	2	1634.27 mg/kg	1634.27	0.771781	IRRITANT	Sensitizer	NON-Sensitizer	2		6.77178		0.3747 mg/L	0.3747	0.544677	11.09 mg/L	11.09	0.949832	19.61 mg/L	19.61	0.960029	2.45454	0.13 log(L/kg)	0.13	0.288889	-2.96	0.391072		3.1345
NOR-P4-1	NON-active	NON-active	Inactive	NON-Carcinogen	Active	Mutagenic	2	Toxicant	Toxic	2	2328.11 mg/kg	2328.11	0.637209	IRRITANT	Sensitizer	NON-Sensitizer	2		6.63721		0.4046 mg/L	0.4046	0.490264	58.61 mg/L	58.61	0.733019	18.42 mg/L	18.42	0.962482	2.18577	0.13 log(L/kg)	0.13	0.288889	-2.95	0.393048		2.8677
NOR-P4-2	NON-active	NON-active	Inactive	Carcinogen	Active	Mutagenic	3	Toxicant	Toxic	2	1617.64 mg/kg	1617.64	0.775006	IRRITANT	Sensitizer	NON-Sensitizer	2		7.77501		0.2974 mg/L	0.2974	0.68535	40.88 mg/L	40.88	0.813913	1.25 mg/L	1.25	0.99787	2.49713	0.12 log(L/kg)	0.12	0.277778	-3.02	0.379222		3.15413
NOR-P5-1	NON-active	NON-active	Inactive	NON-Carcinogen	Active	Mutagenic	2	Toxicant	Unknown	2	1434.53 mg/kg	1434.53	0.810521	IRRITANT	Sensitizer	NON-Sensitizer	2		6.81052		0.3136 mg/L	0.3136	0.655869	132.61 mg/L	132.61	0.395391	1.46 mg/L	1.46	0.997437	2.0487	0.11 log(L/kg)	0.11	0.266667	-2.14	0.553032		2.8684
NOR-P5-2	NON-active	NON-active	Inactive	NON-Carcinogen	Active	Mutagenic	2	Toxicant	Unknown	2	2015.27 mg/kg	2015.27	0.697885	NOT IRRITANT	Sensitizer	NON-Sensitizer	1		5.69789		0.4445 mg/L	0.4445	0.417652	217.36 mg/L	217.36	0.00871447	33.68 mg/L	33.68	0.931031	1.3574	0.09 log(L/kg)	0.09	0.244444	-3.3	0.323919		1.92576
						2	2.33333		2	2	1572.17	1569.23				2	1.55556	6.78383	6.67328										2.48793	2.10031		0.322222	0.292593	0.479953	0.395462	3.2901	2.78837
OFL-P1-1	NON-active	NON-active	Inactive	NON-Carcinogen	Inactive	NON-Mutagenic	0	Toxicant	Toxic	2	2198.21 mg/kg	2198.21	0.662404	IRRITANT	Sensitizer	NON-Sensitizer	2		4.6624		0.3499 mg/L	0.3499	0.589809	22.25 mg/L	22.25	0.898914	0.506 mg/L	0.506	0.999403	2.48813	0.14 log(L/kg)	0.14	0.3	-1.7	0.639937		3.42806
OFL-P1-2	NON-active	NON-active	Inactive	NON-Carcinogen	Inactive	Mutagenic	1	Toxicant	Toxic	2	1016.49 mg/kg	1016.49	0.8916	NOT IRRITANT	Sensitizer	NON-Sensitizer	1		4.8916		0.2732 mg/L	0.2732	0.72939	20.58 mg/L	20.58	0.906533	1.33 mg/L	1.33	0.997705	2.63363	0.14 log(L/kg)	0.14	0.3	-2.26	0.52933		3.46296
OFL-P1-3	NON-active	NON-active	Inactive	NON-Carcinogen	Inactive	Mutagenic	1	Toxicant	Toxic	2	980.77 mg/kg	980.77	0.898528	NOT IRRITANT	Sensitizer	NON-Sensitizer	1		4.89853		0.2755 mg/L	0.2755	0.725205	31.9 mg/L	31.9	0.854885	32.48 mg/L	32.48	0.933504	2.51359	0.09 log(L/kg)	0.09	0.244444	-3.43	0.298242		3.05628
OFL-P2-1	NON-active	NON-active	Inactive	NON-Carcinogen	Inactive	Mutagenic	1	Toxicant	Toxic	2	2368.67 mg/kg	2368.67	0.629343	IRRITANT	Sensitizer	NON-Sensitizer	2		5.62934		0.4391 mg/L	0.4391	0.42748	48.28 mg/L	48.28	0.78015	68.45 mg/L	68.45	0.859368	2.067	0.15 log(L/kg)	0.15	0.311111	-4.08	0.16986		2.54797
OFL-P3-1	NON-active	NON-active	Inactive	NON-Carcinogen	Active	Mutagenic	2	Toxicant	Toxic	2	2491.48 mg/kg	2491.48	0.605523	IRRITANT	Sensitizer	NON-Sensitizer	2		6.60552		0.303 mg/L	0.303	0.675159	7.5 mg/L	7.5	0.966211	54.74 mg/L	54.74	0.887625	2.529	0.15 log(L/kg)	0.15	0.311111	-3.58	0.268615		3.10872
OFL-P4-1	NON-active	NON-active	Inactive	NON-Carcinogen	Inactive	Mutagenic	1	Toxicant	Toxic	2	2485.77 mg/kg	2485.77	0.606631	IRRITANT	NON-Sensitizer	NON-Sensitizer	1		4.60663		0.3457 mg/L	0.3457	0.597452	37.09 mg/L	37.09	0.831205	54.77 mg/L	54.77	0.887563	2.31622	0.14 log(L/kg)	0.14	0.3	-3.57	0.270591		2.88681
OFL-P4-2	NON-active	NON-active	Inactive	NON-Carcinogen	Inactive	Mutagenic	1	Toxicant	Toxic	2	2469.24 mg/kg	2469.24	0.609837	IRRITANT	NON-Sensitizer	NON-Sensitizer	1		4.60984		0.2617 mg/L	0.2617	0.750318	38.11 mg/L	38.11	0.826551	2.04 mg/L	2.04	0.996242	2.57311	0.14 log(L/kg)	0.14	0.3	-2.45	0.491803		3.36491
OFL-P5-1	NON-active	NON-active	Inactive	Carcinogen	Inactive	Mutagenic	2	Toxicant	Unknown	2	2212.32 mg/kg	2212.32	0.659667	NOT IRRITANT	Sensitizer	NON-Sensitizer	1		5.65967		0.4376 mg/L	0.4376	0.430209	106.13 mg/L	106.13	0.516207	4.27 mg/L	4.27	0.991646	1.93806	0.1 log(L/kg)	0.1	0.255556	-2.76	0.430575		2.62419
OFL-P5-2	NON-active	NON-active	Inactive	Carcinogen	Inactive	Mutagenic	2	Toxicant	Unknown	2	2190.29 mg/kg	2190.29	0.66394	IRRITANT	Sensitizer	NON-Sensitizer	2		6.66394		0.4948 mg/L	0.4948	0.326115	174.7 mg/L	174.7	0.203353	98.99 mg/L	98.99	0.796425	1.32589	0.13 log(L/kg)	0.13	0.288889	-3.93	0.199486		1.81427
						2	1.22222		1	2	1472.44	2045.92				2	1.44444	5.80317	5.35861										2.60225	2.26496		0.322222	0.290123	0.389097	0.366493	3.31357	2.92158
PEF-P1-1	NON-active	NON-active	Inactive	NON-Carcinogen	Inactive	NON-Mutagenic	0	Toxicant	Toxic	2	1514.33 mg/kg	1514.33	0.795043	IRRITANT	Sensitizer	NON-Sensitizer	2		4.79504		0.3921 mg/L	0.3921	0.513012	28.81 mg/L	28.81	0.868983	0.7755 mg/L	0.7755	0.998848	2.38084	0.22 log(L/kg)	0.22	0.388889	-1.99	0.582659		3.35239
PEF-P1-2	NON-active	NON-active	Inactive	Carcinogen	Active	Mutagenic	3	Toxicant	Toxic	2	734.14 mg/kg	734.14	0.946363	NOT IRRITANT	Sensitizer	NON-Sensitizer	1		6.94636		0.467 mg/L	0.467	0.376706	28.76 mg/L	28.76	0.869211	2.07 mg/L	2.07	0.99618	2.2421	0.26 log(L/kg)	0.26	0.433333	-2.55	0.472052		3.14748
PEF-P1-3	NON-active	NON-active	Inactive	Carcinogen	Active	Mutagenic	3	Toxicant	Toxic	2	711.2 mg/kg	711.2	0.950812	NOT IRRITANT	Sensitizer	NON-Sensitizer	1		6.95081		0.5637 mg/L	0.5637	0.200728	48.35 mg/L	48.35	0.779831	49.34 mg/L	49.34	0.898755	1.87931	0.07 log(L/kg)	0.07	0.222222	-3.72	0.240964		2.3425
PEF-P2-1	NON-active	NON-active	Inactive	Carcinogen	Active	Mutagenic	3	Toxicant	Toxic	2	2303.7 mg/kg	2303.7	0.641944	IRRITANT	Sensitizer	NON-Sensitizer	2		7.64194		0.4045 mg/L	0.4045	0.490446	65.78 mg/L	65.78	0.700306	100.15 mg/L	100.15	0.794034	1.98479	0.13 log(L/kg)	0.13	0.288889	-4.37	0.112581		2.38626
PEF-P3-1	NON-active	NON-active	Inactive	NON-Carcinogen	Active	Mutagenic	1	Toxicant	Toxic	2	2439.56 mg/kg	2439.56	0.615593	IRRITANT	Sensitizer	NON-Sensitizer	2		5.61559		0.3116 mg/L	0.3116	0.659509	10.49 mg/L	10.49	0.952569	85.16 mg/L	85.16	0.824929	2.43701	0.17 log(L/kg)	0.17	0.333333	-3.88	0.209362		2.9797
PEF-P4-1	NON-active	NON-active	Inactive	NON-Carcinogen	Active	Mutagenic	1	Toxicant	Toxic	2	2428.07 mg/kg	2428.07	0.617822	IRRITANT	Sensitizer	NON-Sensitizer	2		5.61782		0.4315 mg/L	0.4315	0.44131	49.17 mg/L	49.17	0.77609	81.63 mg/L	81.63	0.832204	2.0496	0.16 log(L/kg)	0.16	0.322222	-3.86	0.213312		2.58514
PEF-P4-2	NON-active	NON-active	Inactive	NON-Carcinogen	Active	Mutagenic	1	Toxicant	Toxic	2	1686.2 mg/kg	1686.2	0.761709	IRRITANT	Sensitizer	NON-Sensitizer	2		5.76171		0.3915 mg/L	0.3915	0.514104	50.36 mg/L	50.36	0.77066	3.03 mg/L	3.03	0.994201	2.27897	0.15 log(L/kg)	0.15	0.311111	-2.74	0.434525		3.0246
PEF-P5-1	NON-active	NON-active	Inactive	NON-Carcinogen	Active	Mutagenic	1	Toxicant	Unknown	2	1506.99 mg/kg	1506.99	0.796467	NOT IRRITANT	Sensitizer	NON-Sensitizer	1		4.79647		0.2849 mg/L	0.2849	0.708098	127.93 mg/L	127.93	0.416743	6.36 mg/L	6.36	0.987338	2.11218	0.16 log(L/kg)	0.16	0.322222	-3.05	0.373296		2.8077
PEF-P5-2	NON-active	NON-active	Inactive	NON-Carcinogen	Active	Mutagenic	1	Toxicant	Unknown	2	2115.67 mg/kg	2115.67	0.678412	IRRITANT	Sensitizer	NON-Sensitizer	2		5.67841		0.5331 mg/L	0.5331	0.256415	210.89 mg/L	210.89	0.0382342	147.48 mg/L	147.48	0.696485	0.991134	0.1 log(L/kg)	0.1	0.255556	-4.22	0.142208		1.3889
						3	1.55556		2	2	1963.37	1715.54				2	1.66667	7.70795	5.97824										2.45024	2.03955		0.388889	0.319753	0.365396	0.308996	3.20452	2.6683
RUF-P1-1	NON-active	NON-active	Inactive	NON-Carcinogen	Inactive	Mutagenic	1	Toxicant	Toxic	2	1389.51 mg/kg	1389.51	0.819252	Not Irritant	Sensitizer	NON-Sensitizer	1		4.81925		0.2446 mg/L	0.2446	0.781438	14.89 mg/L	14.89	0.932494	0.6078 mg/L	0.6078	0.999194	2.71313	0.19 log(L/kg)	0.19	0.355556	-1.78	0.624136		3.69282
RUF-P1-2	NON-active	NON-active	Inactive	Carcinogen	Inactive	Mutagenic	2	Toxicant	Toxic	2	667.04 mg/kg	667.04	0.959377	Not Irritant	Sensitizer	NON-Sensitizer	1		5.95938		0.2887 mg/L	0.2887	0.701183	14.7 mg/L	14.7	0.933361	1.8 mg/L	1.8	0.996736	2.63128	0.21 log(L/kg)	0.21	0.377778	-2.34	0.51353		3.52259
RUF-P1-3	NON-active	NON-active	Inactive	Carcinogen	Active	Mutagenic	3	Toxicant	Toxic	2	477.16 mg/kg	477.16	0.996204	Irritant	Sensitizer	NON-Sensitizer	2		7.9962		0.288 mg/L	0.288	0.702457	24.87 mg/L	24.87	0.88696	38.57 mg/L	38.57	0.920952	2.51037	0.05 log(L/kg)	0.05	0.2	-3.51	0.282441		2.99281
RUF-P2-1	NON-active	NON-active	Inactive	NON-Carcinogen	Inactive	Mutagenic	1	Toxicant	Toxic	2	1043.86 mg/kg	1043.86	0.886292	Not Irritant	Sensitizer	NON-Sensitizer	1		4.88629		0.3234 mg/L	0.3234	0.638035	34.48 mg/L	34.48	0.843114	59.42 mg/L	59.42	0.87798	2.35913	0.13 log(L/kg)	0.13	0.288889	-4.16	0.154059		2.80208
RUF-P3-1	NON-active	NON-active	Inactive	NON-Carcinogen	Inactive	Mutagenic	1	Toxicant	Toxic	2	1578.46 mg/kg	1578.46	0.782605	Not Irritant	Sensitizer	NON-Sensitizer	1		4.78261		0.2228 mg/L	0.2228	0.82111	5.29 mg/L	5.29	0.976294	58.22 mg/L	58.22	0.880453	2.67786	0.15 log(L/kg)	0.15	0.311111	-3.67	0.250839		3.23981
RUF-P4-1	NON-active	NON-active	Inactive	NON-Carcinogen	Inactive	Mutagenic	1	Toxicant	Toxic	2	1575.33 mg/kg	1575.33	0.783212	Not Irritant	Sensitizer	NON-Sensitizer	1		4.78321		0.2697 mg/L	0.2697	0.73576	26.09 mg/L	26.09	0.881393	59.38 mg/L	59.38	0.878062	2.49522	0.16 log(L/kg)	0.16	0.322222	-3.65	0.25479		3.07223
RUF-P4-2	NON-active	NON-active	Inactive	NON-Carcinogen	Inactive	Mutagenic	1	Toxicant	Toxic	2	1083.96 mg/kg	1083.96	0.878514	Not Irritant	Sensitizer	NON-Sensitizer	1		4.87851		0.3602 mg/L	0.3602	0.571065	39.76 mg/L	39.76	0.819023	44.17 mg/L	44.17	0.90941	2.2995	0.13 log(L/kg)	0.13	0.288889	-3.7	0.244914		2.8333
RUF-P5-1	NON-active	NON-active	Inactive	Carcinogen	Inactive	Mutagenic	2	Toxicant	Toxic	2	1399.94 mg/kg	1399.94	0.81723	Not Irritant	Sensitizer	NON-Sensitizer	1		5.81723		0.2274 mg/L	0.2274	0.812739	66.54 mg/L	66.54	0.696838	4.65 mg/L	4.65	0.990862	2.50044	0.15 log(L/kg)	0.15	0.311111	-2.84	0.414774		3.22632
RUF-P5-2	NON-active	NON-active	Inactive	Carcinogen	Inactive	Mutagenic	2	Toxicant	Toxic	2	1389.25 mg/kg	1389.25	0.819303	Not Irritant	Sensitizer	NON-Sensitizer	1		5.8193		0.2526 mg/L	0.2526	0.766879	110.24 mg/L	110.24	0.497455	86.73 mg/L	86.73	0.821693	2.08603	0.1 log(L/kg)	0.1	0.255556	-4.01	0.183686		2.52527
						1	1.55556		2	2	457.59	1178.28				1	1.11111	5	5.52689										2.56442	2.47477		0.377778	0.301235	0.385147	0.324796	3.32735	3.1008
SPA-P1-1	NON-active	NON-active	Inactive	Carcinogen	Active	NON-Mutagenic	2	Toxicant	Toxic	2	1976.14 mg/kg	1976.14	0.705474	Irritant	Sensitizer	Sensitizer	3		7.70547		0.3651 mg/L	0.3651	0.562147	1.95 mg/L	1.95	0.991533	0.4349 mg/L	0.4349	0.99955	2.55323	0.3 log(L/kg)	0.3	0.477778	-3.39	0.306143		3.33715
SPA-P1-2	NON-active	NON-active	Inactive	NON-Carcinogen	Active	Mutagenic	2	Toxicant	Toxic	2	1147.46 mg/kg	1147.46	0.866198	Not Irritant	Sensitizer	Sensitizer	2		6.8662		0.393 mg/L	0.393	0.511374	2.09 mg/L	2.09	0.990895	1.02 mg/L	1.02	0.998344	2.50061	0.32 log(L/kg)	0.32	0.5	-3.72	0.240964		3.24158
SPA-P1-3	NON-active	NON-active	Inactive	NON-Carcinogen	Active	Mutagenic	2	Toxicant	Toxic	2	1174.1 mg/kg	1174.1	0.861032	Not Irritant	Sensitizer	Sensitizer	2		6.86103		0.3873 mg/L	0.3873	0.521747	3.2 mg/L	3.2	0.98583	22.56 mg/L	22.56	0.953949	2.46153	0.17 log(L/kg)	0.17	0.333333	-4.89	0.00987557		2.80474
SPA-P2-1	NON-active	NON-active	Inactive	NON-Carcinogen	Active	NON-Mutagenic	1	Toxicant	Toxic	2	2246.35 mg/kg	2246.35	0.653067	Irritant	Sensitizer	Sensitizer	3		6.65307		0.4071 mg/L	0.4071	0.485714	1.33 mg/L	1.33	0.994362	9.02 mg/L	9.02	0.981856	2.46193	0.2 log(L/kg)	0.2	0.366667	-4.12	0.161959		2.99056
SPA-P3-1	NON-active	NON-active	Inactive	NON-Carcinogen	Inactive	NON-Mutagenic	0	Toxicant	Toxic	2	2300.64 mg/kg	2300.64	0.642537	Irritant	NON-Sensitizer	NON-Sensitizer	1		3.64254		0.4463 mg/L	0.4463	0.414377	0.2048 mg/L	0.2048	0.999496	8.06 mg/L	8.06	0.983834	2.39771	0.29 log(L/kg)	0.29	0.466667	-3.62	0.260715		3.12509
SPA-P4-1	NON-active	NON-active	Inactive	NON-Carcinogen	Active	NON-Mutagenic	1	Toxicant	Toxic	2	2300.52 mg/kg	2300.52	0.64256	Irritant	NON-Sensitizer	NON-Sensitizer	1		4.64256		0.3922 mg/L	0.3922	0.51283	2.54 mg/L	2.54	0.988841	4.21 mg/L	4.21	0.991769	2.49344	0.28 log(L/kg)	0.28	0.455556	-3.61	0.26269		3.21169
SPA-P5-1	NON-active	NON-active	Inactive	NON-Carcinogen	Active	NON-Mutagenic	1	Toxicant	Unknown	2	2070.67 mg/kg	2070.67	0.68714	Irritant	Sensitizer	Sensitizer	3		6.68714		0.3214 mg/L	0.3214	0.641674	2.91 mg/L	2.91	0.987153	0.6671 mg/L	0.6671	0.999071	2.6279	0.31 log(L/kg)	0.31	0.488889	-2.8	0.422674		3.53946
SPA-P5-2	NON-active	NON-active	Inactive	NON-Carcinogen	Active	NON-Mutagenic	1	Toxicant	Unknown	2	2104.97 mg/kg	2104.97	0.680488	Not Irritant	Sensitizer	Sensitizer	2		5.68049		0.3683 mg/L	0.3683	0.556324	4.8 mg/L	4.8	0.97853	12.9 mg/L	12.9	0.973859	2.50871	0.17 log(L/kg)	0.17	0.333333	-3.96	0.193561		3.03561
						1	1.25		2	2	2214.94	1915.11				2	2.125	5.65916	6.09231										2.46829	2.50063		0.555556	0.427778	0.393048	0.232323	3.41689	3.16073
TOS-P2-1	NON-active	NON-active	Inactive	NON-Carcinogen	Active	Mutagenic	2	Toxicant	Toxic	2	2219.79 mg/kg	2219.79	0.658218	Irritant	NON-Sensitizer	NON-Sensitizer	1		5.65822		0.2809 mg/L	0.2809	0.715378	6.07 mg/L	6.07	0.972736	36.98 mg/L	36.98	0.924229	2.61234	0.52 log(L/kg)	0.52	0.722222	-3.4	0.304167		3.63873
TOS-P3-1	NON-active	NON-active	Inactive	NON-Carcinogen	Inactive	NON-Mutagenic	0	Toxicant	Toxic	2	2240.69 mg/kg	2240.69	0.654165	Irritant	NON-Sensitizer	NON-Sensitizer	1		3.65416		0.1824 mg/L	0.1824	0.894631	0.9456 mg/L	0.9456	0.996116	27.81 mg/L	27.81	0.943129	2.83388	0.61 log(L/kg)	0.61	0.822222	-2.9	0.402923		4.05902
TOS-P5-1	NON-active	NON-active	Inactive	NON-Carcinogen	Active	Mutagenic	2	Toxicant	Toxic	2	N/A	N/A		Irritant	NON-Sensitizer	NON-Sensitizer	1				0.1245 mg/L	0.1245	1	11.51 mg/L	11.51	0.947915	2.48 mg/L	2.48	0.995335	2.94325	0.76 log(L/kg)	0.76	0.988889	-2.08	0.564882		4.49702
TOS-P5-2	NON-active	NON-active	Inactive	NON-Carcinogen	Active	Mutagenic	2	Toxicant	Toxic	2	N/A	N/A		Irritant	NON-Sensitizer	NON-Sensitizer	1				0.2205 mg/L	0.2205	0.825296	18.73 mg/L	18.73	0.914974	55.54 mg/L	55.54	0.885976	2.62625	0.51 log(L/kg)	0.51	0.711111	-3.24	0.335769		3.67313
						2	1.5		2	2	2226.26	2230.24				1	1	5.65696	4.65619										2.95102	2.75393		1	0.811111	0.535256	0.401936	4.48628	3.96698
GEM-P2-1	NON-active	NON-active	Inactive	Carcinogen	Active	Mutagenic	3	NON-Toxicant	Toxic	1	4558.96 mg/kg	4558.96	0.204532	Irritant	NON-Sensitizer	NON-Sensitizer	1		5.20453		0.291 mg/L	0.291	0.696997	9.54 mg/L	9.54	0.956904	70.68 mg/L	70.68	0.854772	2.50867	0.19 log(L/kg)	0.19	0.355556	-4.22	0.142208		3.00644
GEM-P3-1	NON-active	NON-active	Inactive	Carcinogen	Active	Mutagenic	3	NON-Toxicant	Toxic	1	2231.96 mg/kg	2231.96	0.655858	Irritant	NON-Sensitizer	NON-Sensitizer	1		5.65586		0.4054 mg/L	0.4054	0.488808	1.51 mg/L	1.51	0.993541	56.5 mg/L	56.5	0.883998	2.36635	0.21 log(L/kg)	0.21	0.377778	-3.72	0.240964		2.98509
GEM-P5-1	NON-active	NON-active	Inactive	Carcinogen	Active	Mutagenic	3	NON-Toxicant	Toxic	1	N/A	N/A		Irritant	Sensitizer	NON-Sensitizer	2				0.2398 mg/L	0.2398	0.790173	17.39 mg/L	17.39	0.921088	4.66 mg/L	4.66	0.990842	2.7021	0.27 log(L/kg)	0.27	0.444444	-2.89	0.404898		3.55144
GEM-P5-2	NON-active	NON-active	Inactive	Carcinogen	Active	Mutagenic	3	NON-Toxicant	Toxic	1	N/A	N/A		Irritant	Sensitizer	NON-Sensitizer	2				0.2317 mg/L	0.2317	0.804914	28.78 mg/L	28.78	0.86912	101.08 mg/L	101.08	0.792117	2.46615	0.23 log(L/kg)	0.23	0.4	-4.06	0.17381		3.03996
						3	3		1	1	4315.21	3395.46				1	1.5	5.25181	5.43019										2.60142	2.51082		0.444444	0.394444	0.373296	0.24047	3.41916	3.14573
[truncated: 5 more columns]

## Sheet: S2
	CIP									NOR									ENO									LOM									SPA
	Atom	q(N)	q(N+1)	q(N-1)	f-	f+	f0	CDD		Atom	q(N)	q(N+1)	q(N-1)	f-	f+	f0	CDD		Atom	q(N)	q(N+1)	q(N-1)	f-	f+	f0	CDD		Atom	q(N)	q(N+1)	q(N-1)	f-	f+	f0	CDD		Atom	q(N)	q(N+1)	q(N-1)	f-	f+	f0	CDD
	1(N )	-0.06	-0.0769	0.0364	0.0964	0.0169	0.0567	-0.0795		1(F )	-0.0979	-0.1308	-0.0607	0.0372	0.0329	0.035	-0.0042		1(N )	-0.0594	-0.0815	0.0105	0.07	0.022	0.046	-0.0479		1(F )	-0.0818	-0.1145	-0.0479	0.0339	0.0327	0.0333	-0.0012		1(N )	-0.0693	-0.0814	-0.042	0.0273	0.0122	0.0197	-0.0151
	2(C )	0.041	0.0027	0.0672	0.0262	0.0383	0.0323	0.0122		2(C )	0.0823	0.0436	0.1295	0.0472	0.0387	0.043	-0.0085		2(C )	0.101	0.0494	0.1235	0.0225	0.0516	0.037	0.0291		2(C )	0.0835	0.04	0.1292	0.0457	0.0435	0.0446	-0.0021		2(C )	0.0257	-0.0079	0.0472	0.0215	0.0336	0.0276	0.0122
	3(C )	0.0783	0.0331	0.1368	0.0585	0.0452	0.0519	-0.0133		3(C )	-0.0386	-0.104	-0.0143	0.0243	0.0654	0.0448	0.0412		3(C )	0.0763	0.0261	0.1355	0.0592	0.0503	0.0547	-0.0089		3(C )	-0.0479	-0.1051	-0.0221	0.0259	0.0571	0.0415	0.0313		3(C )	0.0514	0.0242	0.0912	0.0398	0.0272	0.0335	-0.0126
	4(C )	-0.0411	-0.094	-0.0135	0.0276	0.0529	0.0402	0.0253		4(C )	-0.0307	-0.0417	0.0224	0.0531	0.011	0.0321	-0.042		4(C )	-0.0254	-0.1001	0.0025	0.0278	0.0747	0.0513	0.0468		4(C )	-0.0326	-0.0391	0.0283	0.0609	0.0065	0.0337	-0.0544		4(C )	0.0455	0.0138	0.0815	0.036	0.0317	0.0339	-0.0042
	5(C )	-0.038	-0.0431	0.0316	0.0695	0.0052	0.0373	-0.0644		5(C )	0.0397	0.0266	0.0637	0.0239	0.0132	0.0185	-0.0108		5(C )	-0.0411	-0.0513	0.0193	0.0603	0.0103	0.0353	-0.0501		5(C )	0.0297	0.0174	0.0541	0.0244	0.0124	0.0184	-0.012		5(C )	-0.0521	-0.0553	-0.0241	0.0281	0.0032	0.0156	-0.0249
	6(C )	0.0403	0.0295	0.0695	0.0293	0.0107	0.02	-0.0185		6(C )	-0.0745	-0.1366	-0.0558	0.0187	0.0621	0.0404	0.0434		6(C )	0.0962	0.0778	0.124	0.0278	0.0184	0.0231	-0.0095		6(C )	0.0647	0.0137	0.0929	0.0282	0.051	0.0396	0.0228		6(C )	0.0296	0.0243	0.0563	0.0267	0.0053	0.016	-0.0214
	7(C )	-0.0872	-0.135	-0.0584	0.0288	0.0479	0.0383	0.0191		7(C )	0.0408	-0.0123	0.0604	0.0196	0.053	0.0363	0.0334		7(N )	-0.1652	-0.223	-0.1451	0.0201	0.0578	0.0389	0.0376		7(C )	0.0301	-0.0124	0.0502	0.0201	0.0425	0.0313	0.0224		7(C )	0.0462	0.0145	0.1348	0.0886	0.0317	0.0601	-0.0569
	8(N )	-0.0013	-0.0329	0.0193	0.0206	0.0316	0.0261	0.011		8(N )	-0.075	-0.0879	0.0079	0.0829	0.0129	0.0479	-0.07		8(N )	-0.0027	-0.0286	0.0325	0.0352	0.0258	0.0305	-0.0094		8(N )	-0.0593	-0.0766	0.0469	0.1062	0.0173	0.0617	-0.0888		8(N )	0.0007	-0.0404	0.028	0.0273	0.0411	0.0342	0.0138
	9(F )	-0.0992	-0.1334	-0.0537	0.0455	0.0342	0.0399	-0.0113		9(C )	-0.0098	-0.0172	0.0093	0.0191	0.0074	0.0133	-0.0116		9(C )	0.039	-0.0578	0.0608	0.0218	0.0969	0.0593	0.0751		9(C )	-0.0072	-0.0115	0.0096	0.0168	0.0044	0.0106	-0.0124		9(C )	0.0395	-0.0904	0.0607	0.0212	0.1299	0.0756	0.1086
	10(C )	0.036	-0.0793	0.0559	0.0199	0.1153	0.0676	0.0954		10(C )	-0.0129	-0.0191	0.0036	0.0166	0.0062	0.0114	-0.0104		10(C )	-0.0573	-0.0965	-0.0183	0.0389	0.0393	0.0391	0.0003		10(C )	-0.0102	-0.0166	0.003	0.0132	0.0064	0.0098	-0.0068		10(C )	-0.0601	-0.1058	-0.0146	0.0455	0.0457	0.0456	0.0002
	11(C )	-0.0589	-0.1038	-0.0333	0.0256	0.045	0.0353	0.0194		11(N )	-0.1666	-0.1786	-0.1085	0.0581	0.0121	0.0351	-0.046		11(C )	0.0119	0.0035	0.0209	0.009	0.0084	0.0087	-0.0006		11(N )	-0.1588	-0.1609	-0.1275	0.0313	0.002	0.0167	-0.0293		11(C )	0.1171	0.0623	0.1285	0.0114	0.0547	0.0331	0.0433
	12(C )	0.1159	0.0683	0.1394	0.0236	0.0476	0.0356	0.024		12(C )	-0.0123	-0.0195	0.0064	0.0187	0.0071	0.0129	-0.0115		12(C )	-0.0871	-0.0956	-0.0776	0.0095	0.0085	0.009	-0.0009		12(C )	0.0222	0.0188	0.0342	0.0121	0.0033	0.0077	-0.0087		12(C )	-0.0098	-0.0118	-0.0054	0.0043	0.002	0.0032	-0.0023
	13(C )	0.1979	0.1645	0.2079	0.01	0.0334	0.0217	0.0234		13(C )	-0.0145	-0.0192	0.0042	0.0187	0.0047	0.0117	-0.014		13(C )	0.1153	0.0709	0.1417	0.0264	0.0443	0.0354	0.0179		13(C )	-0.0028	-0.0082	0.0145	0.0173	0.0054	0.0113	-0.012		13(C )	0.0174	0.0147	0.0229	0.0055	0.0027	0.0041	-0.0029
	14(C )	-0.0057	-0.01	0.0097	0.0154	0.0043	0.0098	-0.0111		14(N )	-0.0036	-0.0319	0.0206	0.0242	0.0283	0.0263	0.0041		14(C )	0.1984	0.1721	0.2103	0.0119	0.0263	0.0191	0.0144		14(C )	-0.0957	-0.0986	-0.0858	0.01	0.0029	0.0064	-0.0071		14(C )	-0.0876	-0.0921	-0.0811	0.0065	0.0045	0.0055	-0.002
	15(C )	-0.0076	-0.0137	0.002	0.0096	0.0061	0.0079	-0.0035		15(C )	0.036	-0.0599	0.0553	0.0193	0.0959	0.0576	0.0766		15(C )	-0.0069	-0.0132	0.0067	0.0136	0.0063	0.0099	-0.0073		15(F )	-0.0831	-0.1157	-0.0592	0.0238	0.0326	0.0282	0.0087		15(N )	-0.1586	-0.1623	-0.1389	0.0197	0.0038	0.0117	-0.0159
	16(N )	-0.1705	-0.1795	-0.1543	0.0162	0.009	0.0126	-0.0073		16(C )	-0.0609	-0.0961	-0.0301	0.0308	0.0353	0.033	0.0045		16(C )	-0.0121	-0.0196	0.0003	0.0125	0.0074	0.0099	-0.005		16(N )	-0.0019	-0.0371	0.0138	0.0157	0.0352	0.0254	0.0195		16(C )	0.018	0.016	0.0224	0.0044	0.002	0.0032	-0.0024
	17(C )	-0.0099	-0.016	0.0025	0.0124	0.0062	0.0093	-0.0062		17(C )	0.1168	0.0623	0.1386	0.0218	0.0545	0.0382	0.0327		17(N )	-0.1648	-0.1717	-0.1358	0.029	0.0068	0.0179	-0.0222		17(C )	0.0416	-0.0671	0.0593	0.0177	0.1088	0.0632	0.0911		17(C )	-0.0075	-0.0113	-0.0016	0.006	0.0038	0.0049	-0.0022
	18(C )	-0.0006	-0.0057	0.0148	0.0154	0.0051	0.0102	-0.0103		18(C )	0.1973	0.1744	0.2079	0.0106	0.0229	0.0167	0.0123		18(C )	-0.0112	-0.0182	0.0007	0.0119	0.0069	0.0094	-0.005		18(C )	-0.0631	-0.1018	-0.0399	0.0233	0.0387	0.031	0.0154		18(C )	-0.0873	-0.0918	-0.0809	0.0064	0.0045	0.0054	-0.0019
	19(H )	0.0593	0.033	0.0818	0.0225	0.0263	0.0244	0.0038		19(O )	-0.2718	-0.3197	-0.2411	0.0308	0.0479	0.0393	0.0172		19(C )	-0.006	-0.0133	0.0077	0.0137	0.0074	0.0105	-0.0063		19(C )	0.1129	0.0581	0.1323	0.0194	0.0548	0.0371	0.0354		19(C )	0.0139	0.0125	0.0116	-0.0023	0.0014	-0.0005	0.0037
	20(O )	-0.277	-0.3537	-0.1858	0.0912	0.0766	0.0839	-0.0146		20(O )	-0.2741	-0.3573	-0.1887	0.0854	0.0833	0.0843	-0.0021		20(F )	-0.0922	-0.129	-0.0479	0.0443	0.0367	0.0405	-0.0076		20(C )	0.1994	0.1725	0.209	0.0095	0.0269	0.0182	0.0174		20(C )	-0.066	-0.0797	-0.05	0.0161	0.0137	0.0149	-0.0024
	21(H )	0.0316	0.0109	0.0486	0.017	0.0207	0.0188	0.0036		21(C )	0.0165	0.0082	0.0223	0.0057	0.0083	0.007	0.0026		21(O )	-0.2781	-0.3519	-0.1743	0.1038	0.0738	0.0888	-0.03		21(O )	-0.3074	-0.3543	-0.2755	0.0319	0.0469	0.0394	0.015		21(C )	-0.0685	-0.0844	-0.061	0.0075	0.0159	0.0117	0.0084
	22(O )	-0.2717	-0.332	-0.2421	0.0296	0.0603	0.0449	0.0307		22(C )	-0.0759	-0.0848	-0.0686	0.0073	0.0089	0.0081	0.0016		22(O )	-0.2704	-0.322	-0.2356	0.0348	0.0516	0.0432	0.0168		22(O )	-0.283	-0.3656	-0.2074	0.0756	0.0826	0.0791	0.007		22(C )	0.1979	0.1625	0.2115	0.0136	0.0353	0.0245	0.0217
	23(C )	0.0191	0.019	0.0183	-0.0009	0.0001	-0.0004	0.001		23(H )	0.0598	0.0299	0.0799	0.0201	0.0299	0.025	0.0099		23(O )	-0.1964	-0.2166	-0.1784	0.018	0.0201	0.0191	0.0021		23(C )	0.0107	0.0032	0.0146	0.0039	0.0075	0.0057	0.0036		23(F )	-0.092	-0.115	-0.0376	0.0544	0.0231	0.0387	-0.0313
	24(C )	-0.0664	-0.0806	-0.0587	0.0077	0.0143	0.011	0.0066		24(H )	0.038	0.0094	0.0522	0.0142	0.0286	0.0214	0.0144		24(H )	0.066	0.0326	0.0879	0.0219	0.0334	0.0276	0.0115		24(C )	-0.0768	-0.0854	-0.0697	0.0071	0.0086	0.0079	0.0015		24(F )	-0.0984	-0.1248	-0.0628	0.0356	0.0264	0.031	-0.0092
	25(C )	-0.0623	-0.0763	-0.047	0.0153	0.014	0.0147	-0.0013		25(H )	0.0204	0.0053	0.0522	0.0318	0.0151	0.0234	-0.0167		25(H )	0.0545	0.0163	0.0733	0.0188	0.0382	0.0285	0.0193		25(H )	0.059	0.0315	0.0799	0.0209	0.0276	0.0242	0.0067		25(N )	-0.1589	-0.1935	-0.0603	0.0986	0.0345	0.0666	-0.0641
	26(H )	0.0508	0.0099	0.0676	0.0168	0.0408	0.0288	0.024		26(H )	0.0348	0.0319	0.0511	0.0163	0.0029	0.0096	-0.0134		26(H )	0.0428	0.0268	0.0587	0.0159	0.016	0.0159	0.0001		26(H )	0.0215	0.0125	0.0527	0.0313	0.0089	0.0201	-0.0223		26(O )	-0.259	-0.3343	-0.2274	0.0316	0.0753	0.0534	0.0437
	27(H )	0.0205	0.0117	0.0509	0.0304	0.0088	0.0196	-0.0216		27(H )	0.0364	0.0232	0.0603	0.0238	0.0133	0.0186	-0.0105		27(H )	0.0395	0.027	0.0484	0.0089	0.0125	0.0107	0.0036		27(H )	0.0322	0.0278	0.0564	0.0242	0.0044	0.0143	-0.0198		27(O )	-0.2741	-0.3371	-0.2353	0.0388	0.0631	0.0509	0.0242
	28(H )	0.0359	0.0316	0.0547	0.0188	0.0042	0.0115	-0.0146		28(H )	0.0298	0.0248	0.0467	0.0168	0.0051	0.011	-0.0118		28(H )	0.0344	0.0257	0.0445	0.0101	0.0087	0.0094	-0.0014		28(H )	0.015	0.0059	0.0352	0.0202	0.0091	0.0146	-0.0111		28(O )	-0.197	-0.2201	-0.1795	0.0175	0.0231	0.0203	0.0057
	29(H )	0.04	0.0281	0.0596	0.0195	0.012	0.0157	-0.0076		29(H )	0.0992	0.0904	0.1223	0.0231	0.0088	0.0159	-0.0143		29(H )	0.0393	0.0192	0.0567	0.0174	0.02	0.0187	0.0026		29(H )	0.04	0.0284	0.0621	0.0221	0.0116	0.0169	-0.0105		29(H )	0.0533	0.0085	0.0703	0.017	0.0448	0.0309	0.0279
	30(H )	0.0298	0.0231	0.0415	0.0116	0.0067	0.0092	-0.0049		30(H )	0.0376	0.0229	0.0631	0.0254	0.0147	0.0201	-0.0107		30(H )	0.0346	0.0302	0.036	0.0014	0.0044	0.0029	0.003		30(H )	0.1061	0.0944	0.1297	0.0236	0.0117	0.0177	-0.0119		30(H )	0.0226	0.0154	0.0354	0.0128	0.0072	0.01	-0.0056
	31(H )	0.1038	0.0939	0.1196	0.0158	0.0099	0.0129	-0.0059		31(H )	0.0309	0.0248	0.0483	0.0175	0.006	0.0118	-0.0115		31(H )	0.0283	0.0157	0.0539	0.0256	0.0126	0.0191	-0.013		31(H )	0.0147	0.0029	0.0365	0.0218	0.0119	0.0168	-0.0099		31(H )	0.0337	0.0342	0.037	0.0033	-0.0005	0.0014	-0.0038
	32(H )	0.0194	0.0164	0.0297	0.0103	0.003	0.0066	-0.0073		32(H )	0.0197	0.0082	0.0488	0.0291	0.0115	0.0203	-0.0176		32(H )	0.0344	0.0308	0.046	0.0116	0.0036	0.0076	-0.008		32(H )	0.0248	0.0095	0.0609	0.036	0.0154	0.0257	-0.0207		32(H )	0.0144	0.0114	0.0227	0.0083	0.003	0.0056	-0.0053
	33(H )	0.0358	0.0225	0.0568	0.0211	0.0133	0.0172	-0.0077		33(H )	0.0384	0.0339	0.0547	0.0163	0.0045	0.0104	-0.0118		33(H )	0.0375	0.0235	0.0563	0.0188	0.0139	0.0164	-0.0049		33(H )	0.0385	0.0358	0.0529	0.0144	0.0027	0.0085	-0.0117		33(H )	0.0326	0.0282	0.0394	0.0068	0.0045	0.0056	-0.0023
	34(H )	0.0398	0.0357	0.0543	0.0145	0.0041	0.0093	-0.0104		34(H )	0.0492	0.0151	0.064	0.0148	0.0342	0.0245	0.0194		34(H )	0.0173	0.0101	0.0334	0.016	0.0072	0.0116	-0.0088		34(H )	0.0284	0.0165	0.0476	0.0192	0.0119	0.0156	-0.0072		34(H )	0.0329	0.0302	0.0391	0.0062	0.0026	0.0044	-0.0036
	35(H )	0.0338	0.0219	0.0631	0.0293	0.0119	0.0206	-0.0174		35(H )	0.0418	0.0254	0.0502	0.0085	0.0164	0.0124	0.0079		35(H )	0.1071	0.0934	0.1288	0.0217	0.0137	0.0177	-0.0079		35(H )	0.0292	0.0328	0.0311	0.0019	-0.0036	-0.0008	-0.0055		35(H )	0.0317	0.0219	0.0443	0.0125	0.0098	0.0112	-0.0027
	36(H )	0.0471	0.0295	0.0572	0.01	0.0176	0.0138	0.0076		36(H )	0.0402	0.0237	0.0482	0.008	0.0165	0.0122	0.0085		36(H )	0.039	0.0248	0.0581	0.0191	0.0142	0.0167	-0.005		36(H )	0.0299	0.025	0.0428	0.0129	0.0049	0.0089	-0.008		36(H )	0.0992	0.0896	0.1151	0.0159	0.0096	0.0127	-0.0063
	37(H )	0.0471	0.0291	0.0567	0.0096	0.0181	0.0138	0.0085		37(H )	0.0429	0.034	0.0508	0.0079	0.009	0.0084	0.0011		37(H )	0.0191	0.0124	0.0348	0.0157	0.0068	0.0112	-0.009		37(H )	0.0522	0.0159	0.066	0.0138	0.0363	0.0251	0.0225		37(H )	0.0163	0.0141	0.0234	0.0071	0.0023	0.0047	-0.0048
	38(H )	0.0508	0.0434	0.0538	0.003	0.0074	0.0052	0.0044		38(H )	0.0467	0.0264	0.0599	0.0132	0.0202	0.0167	0.007		38(H )	0.0282	0.0134	0.0553	0.027	0.0149	0.0209	-0.0121		38(H )	0.0387	0.0247	0.0428	0.0041	0.014	0.009	0.0099		38(H )	0.0238	0.0138	0.0398	0.016	0.01	0.013	-0.006
	39(H )	0.051	0.0325	0.0664	0.0154	0.0185	0.0169	0.0031		39(H )	0.0427	0.0338	0.0505	0.0078	0.0089	0.0084	0.0011		39(H )	0.0358	0.0313	0.0462	0.0104	0.0046	0.0075	-0.0058		39(H )	0.0387	0.0231	0.046	0.0072	0.0156	0.0114	0.0084		39(H )	0.0337	0.0325	0.0373	0.0036	0.0013	0.0024	-0.0023
	40(H )	0.0521	0.0438	0.0611	0.0089	0.0083	0.0086	-0.0006		40(O )	-0.1984	-0.2173	-0.1826	0.0158	0.0189	0.0173	0.0031		40(H )	0.1802	0.1564	0.1978	0.0176	0.0238	0.0207	0.0061		40(H )	0.0428	0.0341	0.0509	0.0081	0.0087	0.0084	0.0007		40(H )	0.0325	0.0276	0.0397	0.0072	0.0049	0.0061	-0.0023
	41(O )	-0.1986	-0.2211	-0.1827	0.0158	0.0225	0.0192	0.0066		41(H )	0.1792	0.1558	0.1949	0.0157	0.0234	0.0195	0.0077											41(H )	0.0424	0.0346	0.0492	0.0068	0.0078	0.0073	0.001		41(H )	0.0316	0.0223	0.0437	0.0121	0.0094	0.0107	-0.0027
	42(H )	0.1788	0.153	0.1949	0.0161	0.0258	0.021	0.0097																				42(H )	0.0461	0.0244	0.0589	0.0128	0.0216	0.0172	0.0088		42(H )	0.0343	0.0309	0.0404	0.0061	0.0034	0.0047	-0.0027
																												43(O )	-0.1659	-0.1903	-0.1558	0.01	0.0244	0.0172	0.0144		43(H )	0.0467	0.0288	0.0572	0.0105	0.0179	0.0142	0.0074
																												44(H )	0.1826	0.1576	0.1974	0.0148	0.025	0.0199	0.0102		44(H )	0.0494	0.0303	0.0658	0.0164	0.019	0.0177	0.0026
																																					45(H )	0.0493	0.0413	0.0581	0.0088	0.0079	0.0084	-0.0009
																																					46(H )	0.0488	0.029	0.0599	0.0111	0.0198	0.0154	0.0087
																																					47(H )	0.0484	0.0404	0.0514	0.0031	0.008	0.0055	0.0049
																																					48(H )	0.1234	0.1003	0.1577	0.0342	0.0231	0.0287	-0.0111
																																					49(H )	0.1053	0.0914	0.1319	0.0266	0.0139	0.0203	-0.0127
																																					50(H )	0.1794	0.1526	0.1965	0.0171	0.0268	0.0219	0.0098

## Sheet: S3
	HOMO(a.u.)	LOMO(a.u.)	LUMO-HOMO(a.u.)
CIP	-0.202261		0.274067
CLI	-0.215877		0.287683
ENO	-0.213191		0.284997
FLE	-0.2173		0.289106
GAT	-0.217312		0.289118
LEV	-0.206064		0.27787
LOM	-0.203863		0.275669
MOX	-0.20463		0.276436
NAD	-0.217613		0.289419
NOR	-0.207466		0.279272
OFL	-0.201546		0.273352
PEF	-0.200393		0.272199
RUF	-0.2043		0.276106
SPA	-0.19226		0.264066
TOS	-0.210373		0.282179
GEM	-0.21339		0.285196
OH		0.071806
